# Supplementary material
Source: Springer Nature journal article supplement (https://www.springermedizin.de/resource/supplementary/13045_2014_400_MOESM3_ESM.pdf/9661292)
Supplement: MOESM3 [file 9661292]

Additional file 3- Differentially expressed miRNAs in granulocytes compared to promyelocytes that have predicted mRNA targets showing inversely correlated expression

| MicroRNA name<br>(Granulocytes/Promyelocytes<br>expression) | Target mRNAs                         |                                                     |          |          |          |          |
|-------------------------------------------------------------|--------------------------------------|-----------------------------------------------------|----------|----------|----------|----------|
|                                                             | Symbol                               | log Fold Change<br>(Granulocytes/Pro<br>myelocytes) | tstat    | adjPval  | Probe    |          |
| mmu-miR-139-5p (↑)                                          | <i>Asf1a</i>                         | -2.82                                               | -20.5    | 4.00E-04 | 10363163 |          |
|                                                             | <i>Cxnc</i>                          | -2.83                                               | -12.9    | 8.00E-04 | 10385599 |          |
|                                                             | <i>Dpp30</i>                         | -2.75                                               | -14.1    | 7.00E-04 | 10452867 |          |
|                                                             | <i>Elovl5</i>                        | -2.94                                               | -17.9    | 5.00E-04 | 10387284 |          |
|                                                             | <i>Gpr56</i>                         | -4.29                                               | -10.6    | 0.001    | 10574259 |          |
|                                                             | <i>Hdef</i>                          | -3.2                                                | -20.2    | 4.00E-04 | 10493086 |          |
|                                                             | <i>Hs2st1</i>                        | -2.48                                               | -7.5     | 0.004    | 10502522 |          |
|                                                             | <i>Kbtbd8</i>                        | -2.03                                               | -10.2    | 0.002    | 10540227 |          |
|                                                             | <i>Pdk11</i>                         | -2.12                                               | -15.5    | 6.00E-04 | 10517243 |          |
|                                                             | <i>Tcf12</i>                         | -3.29                                               | -18.4    | 4.00E-04 | 10594879 |          |
|                                                             | <i>Tgfb1</i>                         | -2.16                                               | -16      | 5.00E-04 | 10452633 |          |
|                                                             | mmu-miR-135a (↑)<br>mmu-miR-135b (↑) | <i>Abce1</i>                                        | -4.57    | -19.9    | 4.00E-04 | 10579874 |
| <i>Bace1</i>                                                |                                      | -2.14                                               | -15.4    | 6.00E-04 | 10584941 |          |
| <i>Bzw2</i>                                                 |                                      | -4.67                                               | -26.8    | 3.00E-04 | 10400030 |          |
| <i>C8orf13</i>                                              |                                      | -3.34                                               | -16.4    | 5.00E-04 | 10562548 |          |
| <i>Ccdc50</i>                                               |                                      | -2.76                                               | -11.1    | 0.001    | 10434869 |          |
| <i>Chk1</i>                                                 |                                      | -4.34                                               | -17.9    | 5.00E-04 | 10592201 |          |
| <i>Elovl6</i>                                               |                                      | -3                                                  | -11.1    | 0.001    | 10495993 |          |
| <i>Enpd4</i>                                                |                                      | -2.07                                               | -11.5    | 0.001    | 10416199 |          |
| <i>Fbln1a</i>                                               |                                      | -2.11                                               | -13.2    | 8.00E-04 | 10477012 |          |
| <i>Gria3</i>                                                |                                      | -6.15                                               | -27.8    | 3.00E-04 | 10599348 |          |
| <i>Ints2</i>                                                |                                      | -3.55                                               | -22.6    | 3.00E-04 | 10389421 |          |
| <i>Kctd1</i>                                                |                                      | -2.19                                               | -10.5    | 0.001    | 10457606 |          |
| <i>Man1a</i>                                                |                                      | -4.55                                               | -27.2    | 3.00E-04 | 10369154 |          |
| <i>Neto2</i>                                                |                                      | -2.84                                               | -12.1    | 0.001    | 10580382 |          |
| <i>Npat</i>                                                 |                                      | -2.68                                               | -12.7    | 9.00E-04 | 10585358 |          |
| <i>Nucks1</i>                                               |                                      | -3.98                                               | -15.1    | 6.00E-04 | 10349733 |          |
| <i>Parn</i>                                                 |                                      | -3.24                                               | -21.5    | 4.00E-04 | 10437778 |          |
| <i>Phf17</i>                                                |                                      | -2.36                                               | -16.3    | 5.00E-04 | 10491860 |          |
| <i>Rnf26</i>                                                |                                      | -2.45                                               | -11.8    | 0.001    | 10545534 |          |
| <i>Smad5</i>                                                |                                      | -2.46                                               | -9.7     | 0.002    | 10405605 |          |
| <i>Ssr2</i>                                                 |                                      | -3.28                                               | -23      | 3.00E-04 | 10493259 |          |
| <i>Syncrip</i>                                              |                                      | -2.82                                               | -16.3    | 5.00E-04 | 10595604 |          |
| <i>Tescn3</i>                                               |                                      | -2.3                                                | -15.1    | 6.00E-04 | 10382610 |          |
| <i>Tspan51</i>                                              |                                      | -3.83                                               | -24.9    | 3.00E-04 | 10373027 |          |
| <i>Ubf1</i>                                                 |                                      | -2.79                                               | -16      | 5.00E-04 | 10557139 |          |
| mmu-miR-365 (↑)                                             |                                      | <i>Bcl2</i>                                         | -2.88    | -20.7    | 4.00E-04 | 10357043 |
|                                                             |                                      | <i>Eefsec</i>                                       | -2.61    | -15.1    | 6.00E-04 | 10546104 |
|                                                             |                                      | <i>Mets1</i>                                        | -3.66    | -9.1     | 0.002    | 10384504 |
|                                                             |                                      | <i>Ppp5c</i>                                        | -3.15    | -19.4    | 4.00E-04 | 10560315 |
| mmu-miR-194 (↑)                                             |                                      | <i>Arhgap21</i>                                     | -2.49    | -10      | 0.002    | 10480381 |
|                                                             |                                      | <i>Atp5e1</i>                                       | -2.81    | -16.4    | 5.00E-04 | 10391100 |
|                                                             |                                      | <i>Chd9</i>                                         | -2.87    | -16.7    | 5.00E-04 | 10573823 |
|                                                             | <i>Lphn2</i>                         | -3.25                                               | -14.7    | 6.00E-04 | 10502780 |          |
|                                                             | <i>Mef2c</i>                         | -2.16                                               | -12.3    | 9.00E-04 | 10406434 |          |
|                                                             | <i>Ncl</i>                           | -2.98                                               | -17.2    | 5.00E-04 | 10356312 |          |
|                                                             | <i>Nude</i>                          | -4.19                                               | -16      | 5.00E-04 | 10578019 |          |
|                                                             | <i>Pgm3</i>                          | -3.16                                               | -19.6    | 4.00E-04 | 10595466 |          |
|                                                             | <i>Sdad1</i>                         | -4.51                                               | -17.8    | 5.00E-04 | 10531383 |          |
|                                                             | <i>Sephs1</i>                        | -2.67                                               | -13.5    | 8.00E-04 | 10469035 |          |
|                                                             | <i>Sfr</i>                           | -3.72                                               | -26.8    | 3.00E-04 | 10470892 |          |
|                                                             | <i>Tirc</i>                          | -3.33                                               | -18.9    | 4.00E-04 | 10435025 |          |
|                                                             | <i>Ube2i2</i>                        | -2.02                                               | -10.5    | 0.001    | 10437942 |          |
|                                                             | mmu-miR-10b (↑)                      | <i>Chx5</i>                                         | -4.33    | -12.9    | 8.00E-04 | 10433088 |
|                                                             |                                      | <i>Clic6</i>                                        | -3.33    | -20.9    | 4.00E-04 | 10381072 |
| <i>Eif3j</i>                                                |                                      | -2.69                                               | -15.3    | 6.00E-04 | 10475405 |          |
| <i>Elovl6</i>                                               |                                      | -3                                                  | -11.1    | 0.001    | 10495993 |          |
| <i>Kpmb1</i>                                                |                                      | -2.25                                               | -14      | 7.00E-04 | 10390352 |          |
| <i>Lanc11</i>                                               |                                      | -2.69                                               | -15      | 6.00E-04 | 10355266 |          |
| <i>Mif2</i>                                                 |                                      | -2.19                                               | -12.6    | 9.00E-04 | 10523905 |          |
| <i>Zfp367</i>                                               |                                      | -2.71                                               | -11.8    | 0.001    | 10410092 |          |
| <i>Zfp706</i>                                               |                                      | -2.42                                               | -11      | 0.001    | 10349049 |          |
| mmu-miR-28 (↑)<br>mmu-miR-200c (↑)                          |                                      | <i>Srprb</i>                                        | -3.02    | -18.6    | 4.00E-04 | 10596137 |
|                                                             | <i>1110002B05Rik</i>                 | -2.8                                                | -15.9    | 5.00E-04 | 10400321 |          |
|                                                             | <i>6330409N04Rik</i>                 | -2.17                                               | -14.3    | 7.00E-04 | 10420659 |          |
|                                                             | <i>Abi2</i>                          | -2.53                                               | -15.4    | 6.00E-04 | 10346764 |          |
|                                                             | <i>Acaca</i>                         | -2.65                                               | -13.1    | 8.00E-04 | 10379820 |          |
|                                                             | <i>Aif3</i>                          | -2.59                                               | -9.4     | 0.002    | 10354111 |          |
|                                                             | <i>Ak3l1</i>                         | -1.73                                               | -9.2     | 0.002    | 10506269 |          |
|                                                             | <i>Asf1a</i>                         | -2.82                                               | -20.5    | 4.00E-04 | 10363163 |          |
|                                                             | <i>Arp2a2</i>                        | -3.07                                               | -14.4    | 7.00E-04 | 10353483 |          |
|                                                             | <i>Bcl2</i>                          | -2.88                                               | -20.7    | 4.00E-04 | 10357043 |          |
| <i>Calu</i>                                                 | -3.7                                 | -18.1                                               | 5.00E-04 | 10356818 |          |          |
| <i>Cxnc</i>                                                 | -2.83                                | -12.9                                               | 8.00E-04 | 10385599 |          |          |
| <i>Chx5</i>                                                 | -4.33                                | -12.9                                               | 8.00E-04 | 10433088 |          |          |
| <i>Cme2</i>                                                 | -2.7                                 | -6.7                                                | 0.006    | 10503264 |          |          |
| <i>Cdc25a</i>                                               | -2.08                                | -8.4                                                | 0.003    | 10589420 |          |          |
| <i>Cdk6</i>                                                 | -4.23                                | -29.9                                               | 3.00E-04 | 10519324 |          |          |
| <i>Clic4</i>                                                | -2.18                                | -9.1                                                | 0.002    | 10517336 |          |          |
| <i>Cnn3</i>                                                 | -3.37                                | -17.3                                               | 5.00E-04 | 10406852 |          |          |
| <i>Crtap</i>                                                | -3.25                                | -23.7                                               | 3.00E-04 | 10597413 |          |          |
| <i>Dek</i>                                                  | -2.92                                | -10.2                                               | 0.002    | 10409031 |          |          |
| <i>Dpp1911</i>                                              | -3.78                                | -20.8                                               | 4.00E-04 | 10591816 |          |          |
| <i>Eif2s1</i>                                               | -3.46                                | -19.2                                               | 4.00E-04 | 10396785 |          |          |
| <i>Eif3j</i>                                                | -2.69                                | -15.3                                               | 6.00E-04 | 10475405 |          |          |
| <i>Epha7</i>                                                | -2.82                                | -13.3                                               | 8.00E-04 | 10503659 |          |          |
| <i>Egfr1ap</i>                                              | -2.18                                | -15.8                                               | 5.00E-04 | 10441620 |          |          |
| <i>Fubp1</i>                                                | -2.95                                | -19.6                                               | 4.00E-04 | 10496892 |          |          |
| <i>Fyn</i>                                                  | -2.13                                | -11.3                                               | 0.001    | 10362596 |          |          |
| <i>Gata2</i>                                                | -2.63                                | -12.4                                               | 9.00E-04 | 10539873 |          |          |
| <i>Gfi1</i>                                                 | -2.03                                | -14.9                                               | 6.00E-04 | 10532124 |          |          |
| <i>Hmgb3</i>                                                | -2.34                                | -10.3                                               | 0.002    | 10600017 |          |          |
| <i>Hnmpab</i>                                               | -2.84                                | -15                                                 | 6.00E-04 | 10385686 |          |          |
| <i>Hs2st1</i>                                               | -2.48                                | -7.5                                                | 0.004    | 10502522 |          |          |
| <i>Hspa9</i>                                                | -4.9                                 | -26.3                                               | 3.00E-04 | 10458226 |          |          |
| <i>Irf2</i>                                                 | -2.23                                | -12                                                 | 0.001    | 10355312 |          |          |
| <i>Mgat2</i>                                                | -2.48                                | -10.4                                               | 0.001    | 10396074 |          |          |
| <i>Mrs25</i>                                                | -2.3                                 | -14.7                                               | 6.00E-04 | 10546396 |          |          |
| <i>Mif2</i>                                                 | -2.19                                | -12.6                                               | 9.00E-04 | 10523905 |          |          |
| <i>Mfb</i>                                                  | -3.49                                | -19                                                 | 4.00E-04 | 10368199 |          |          |
| <i>Nedd1</i>                                                | -2.36                                | -13.6                                               | 7.00E-04 | 10371907 |          |          |
| <i>Nme1</i>                                                 | -4.5                                 | -27.5                                               | 3.00E-04 | 10389865 |          |          |
| <i>Nudcd1</i>                                               | -3.79                                | -14.8                                               | 6.00E-04 | 10428412 |          |          |
| <i>Nup107</i>                                               | -2.71                                | -19.5                                               | 4.00E-04 | 10372687 |          |          |
| <i>Pdc4</i>                                                 | -2.55                                | -16.7                                               | 5.00E-04 | 10463997 |          |          |
| <i>Pdk11</i>                                                | -2.12                                | -15.5                                               | 6.00E-04 | 10517243 |          |          |
| <i>Pds5b</i>                                                | -2.68                                | -14.9                                               | 6.00E-04 | 10527832 |          |          |
| <i>Phf2</i>                                                 | -2.46                                | -13.9                                               | 7.00E-04 | 10528238 |          |          |
| <i>Ppm1f</i>                                                | -2.22                                | -13.2                                               | 8.00E-04 | 10433929 |          |          |
| <i>Ptpb1</i>                                                | -3.3                                 | -20.9                                               | 4.00E-04 | 10364518 |          |          |
| <i>Qsox1</i>                                                | -4.99                                | -36.7                                               | 3.00E-04 | 10485622 |          |          |
| <i>Rab38</i>                                                | -3.77                                | -14.3                                               | 7.00E-04 | 10554800 |          |          |
| <i>Ralgs2</i>                                               | -2.08                                | -8.7                                                | 0.003    | 10359201 |          |          |
| <i>Rgr</i>                                                  | -2.17                                | -10.2                                               | 0.002    | 10603598 |          |          |
| <i>Sat2</i>                                                 | -4.45                                | -16.7                                               | 5.00E-04 | 10463355 |          |          |
| <i>Sac61a2</i>                                              | -2.12                                | -9.4                                                | 0.002    | 10479887 |          |          |
| <i>Sephs1</i>                                               | -2.67                                | -13.5                                               | 8.00E-04 | 10469035 |          |          |
| <i>Sfn1</i>                                                 | -4.18                                | -26.3                                               | 3.00E-04 | 10405236 |          |          |
| <i>Skp2</i>                                                 | -2.97                                | -21.9                                               | 4.00E-04 | 10427606 |          |          |
| <i>Smarcd1</i>                                              | -3.33                                | -15                                                 | 6.00E-04 | 10538755 |          |          |
| <i>Snx30</i>                                                | -2.4                                 | -11.4                                               | 0.001    | 10505224 |          |          |
| <i>Syncrip</i>                                              | -2.82                                | -16.3                                               | 5.00E-04 | 10595604 |          |          |
| <i>Tcerg1</i>                                               | -3.7                                 | -18                                                 | 5.00E-04 | 10455346 |          |          |
| <i>Tcf12</i>                                                | -3.29                                | -18.4                                               | 4.00E-04 | 10594879 |          |          |

Key: ↑ Upregulated  
↓ Downregulated

|                  |                      |       |       |          |          |
|------------------|----------------------|-------|-------|----------|----------|
|                  | <i>Tex2</i>          | -2.44 | -6.5  | 0.007    | 10392207 |
|                  | <i>Tirc</i>          | -3.33 | -18.9 | 4.00E-04 | 10435075 |
|                  | <i>Trim44</i>        | -2.98 | -16.7 | 5.00E-04 | 10485395 |
|                  | <i>Tubb5</i>         | -3.97 | -12.5 | 9.00E-04 | 10450605 |
|                  | <i>Uspbn1</i>        | -2.57 | -18.6 | 4.00E-04 | 10469110 |
|                  | <i>Zmyx4</i>         | -2.3  | -12.7 | 9.00E-04 | 10516455 |
| mmu-miR-26a (↑)  | <i>Abl2</i>          | -2.53 | -15.4 | 6.00E-04 | 10340784 |
| mmu-miR-26b (↑)  | <i>Acl3</i>          | -2.29 | -14   | 7.00E-04 | 10347258 |
| mmu-miR-26b* (↑) | <i>Ahrap21</i>       | -2.49 | -10   | 0.002    | 10480381 |
|                  | <i>Apl10a</i>        | -2.82 | -14.8 | 6.00E-04 | 10553788 |
|                  | <i>Cend2</i>         | -2.71 | -11.6 | 0.001    | 10548105 |
|                  | <i>Dendc6</i>        | -2.72 | -8    | 0.003    | 10424126 |
|                  | <i>Dnm11</i>         | -2.23 | -15.4 | 6.00E-04 | 10437992 |
|                  | <i>Ezh2</i>          | -3.13 | -20.5 | 4.00E-04 | 10544501 |
|                  | <i>Fkbp3</i>         | -4.29 | -29.5 | 3.00E-04 | 10400581 |
|                  | <i>Gnptat1</i>       | -3.55 | -16.5 | 5.00E-04 | 10419216 |
|                  | <i>Grb10</i>         | -2.17 | -13.6 | 7.00E-04 | 10384398 |
|                  | <i>Hmga1</i>         | -2.84 | -14.9 | 6.00E-04 | 10383479 |
|                  | <i>Hurvl</i>         | -2.14 | -14.8 | 6.00E-04 | 10602501 |
|                  | <i>Ints2</i>         | -3.55 | -22.6 | 3.00E-04 | 10389421 |
|                  | <i>Ippr1</i>         | -3.21 | -19.8 | 4.00E-04 | 10540408 |
|                  | <i>Kbhd8</i>         | -2.03 | -10.2 | 0.002    | 10540227 |
|                  | <i>Kpna2</i>         | -2.21 | -9.6  | 0.002    | 10497593 |
|                  | <i>Lman1</i>         | -4.75 | -31.1 | 3.00E-04 | 10459481 |
|                  | <i>Mat2a</i>         | -3.23 | -17.4 | 5.00E-04 | 10545417 |
|                  | <i>Mdn1</i>          | -2.77 | -18.6 | 4.00E-04 | 10503723 |
|                  | <i>Mtx2</i>          | -2.79 | -14.6 | 6.00E-04 | 10472994 |
|                  | <i>Onud4</i>         | -2.03 | -14.2 | 7.00E-04 | 10573027 |
|                  | <i>Pdxc</i>          | -2.35 | -12.7 | 9.00E-04 | 10485429 |
|                  | <i>Pdik11</i>        | -2.12 | -15.5 | 6.00E-04 | 10517243 |
|                  | <i>Pgm211</i>        | -2.73 | -12.2 | 0.001    | 10555303 |
|                  | <i>Phf6</i>          | -2.85 | -13.2 | 8.00E-04 | 10599612 |
|                  | <i>Ren2</i>          | -2    | -10.7 | 0.001    | 10585545 |
|                  | <i>Rpgr</i>          | -2.17 | -10.2 | 0.002    | 10603598 |
|                  | <i>Scoc</i>          | -2.67 | -16.7 | 5.00E-04 | 10450904 |
|                  | <i>Serbpl</i>        | -2.63 | -11.5 | 0.001    | 10538857 |
|                  | <i>Sgeb</i>          | -2.38 | -10.1 | 0.002    | 10530653 |
|                  | <i>Sh2</i>           | -2.97 | -21.9 | 4.00E-04 | 10427666 |
|                  | <i>Sns30</i>         | -2.4  | -11.4 | 0.001    | 10505224 |
|                  | <i>Srbp</i>          | -2.39 | -10.8 | 0.001    | 10482181 |
|                  | <i>Thsp2</i>         | -2.12 | -6.8  | 0.006    | 10372497 |
|                  | <i>Whsc1</i>         | -2.55 | -18.6 | 4.00E-04 | 10521136 |
|                  | <i>Zc3h7b</i>        | -2.12 | -14.8 | 6.00E-04 | 10425578 |
| mmu-miR-15a (↑)  | <i>1300001101Rik</i> | -3.87 | -21.5 | 4.00E-04 | 10378453 |
| mmu-miR-15b (↑)  | <i>Akl1</i>          | -3.01 | -13.6 | 7.00E-04 | 10472923 |
| mmu-miR-15b* (↑) | <i>Akt3</i>          | -2.59 | -15   | 6.00E-04 | 10360506 |
|                  | <i>Aps5l</i>         | -2.81 | -16.4 | 5.00E-04 | 10391100 |
|                  | <i>Bace1</i>         | -2.14 | -15.4 | 6.00E-04 | 10584941 |
|                  | <i>Bcl2</i>          | -2.88 | -20.7 | 4.00E-04 | 10357043 |
|                  | <i>Chx5</i>          | -4.33 | -12.9 | 8.00E-04 | 10433088 |
|                  | <i>Cend2</i>         | -2.71 | -11.6 | 0.001    | 10548105 |
|                  | <i>Cene1</i>         | -2.12 | -12.3 | 9.00E-04 | 10562563 |
|                  | <i>Cdc25a</i>        | -2.08 | -8.4  | 0.003    | 10589420 |
|                  | <i>Chd9</i>          | -2.87 | -16.7 | 5.00E-04 | 10573353 |
|                  | <i>Chk1</i>          | -4.34 | -17.9 | 5.00E-04 | 10592201 |
|                  | <i>Cpm2a</i>         | -2.31 | -12.9 | 8.00E-04 | 10547926 |
|                  | <i>Eif2s1</i>        | -3.46 | -19.2 | 4.00E-04 | 10396795 |
|                  | <i>Eif4e</i>         | -2.32 | -12.4 | 9.00E-04 | 10496485 |
|                  | <i>Epha7</i>         | -2.82 | -13.3 | 8.00E-04 | 10503659 |
|                  | <i>Fbxo21</i>        | -2.23 | -13.4 | 8.00E-04 | 10524941 |
|                  | <i>Fkbp1a</i>        | -2.11 | -13.2 | 8.00E-04 | 10477012 |
|                  | <i>Gao2</i>          | -2.73 | -18.5 | 4.00E-04 | 10567626 |
|                  | <i>Gpn1</i>          | -3.05 | -15.9 | 5.00E-04 | 10520800 |
|                  | <i>Hdgf</i>          | -3.2  | -20.2 | 4.00E-04 | 10493086 |
|                  | <i>Hmga1</i>         | -2.84 | -14.9 | 6.00E-04 | 10383479 |
|                  | <i>Hnrnpa1</i>       | -1.87 | -8.4  | 0.003    | 10427885 |
|                  | <i>Isoe1</i>         | -2.92 | -16.4 | 5.00E-04 | 10455912 |
|                  | <i>Kdsr</i>          | -2.12 | -13   | 8.00E-04 | 10357051 |
|                  | <i>Lpin2</i>         | -2.58 | -8.9  | 0.002    | 10502776 |
|                  | <i>Mvb</i>           | -3.49 | -19   | 4.00E-04 | 10368199 |
|                  | <i>Nup210</i>        | -3.84 | -22.5 | 3.00E-04 | 10546294 |
|                  | <i>Ocri</i>          | -3.21 | -19.7 | 4.00E-04 | 10599435 |
|                  | <i>Onud4</i>         | -2.03 | -14.2 | 7.00E-04 | 10573027 |
|                  | <i>Pdcd4</i>         | -2.55 | -16.7 | 5.00E-04 | 10463997 |
|                  | <i>Pdia6</i>         | -3.72 | -27.5 | 3.00E-04 | 10394735 |
|                  | <i>Pdik11</i>        | -2.12 | -15.5 | 6.00E-04 | 10517243 |
|                  | <i>Pipn4</i>         | -3.07 | -22   | 4.00E-04 | 10357191 |
|                  | <i>Rad23b</i>        | -2.05 | -12.3 | 9.00E-04 | 10505092 |
|                  | <i>Scoc</i>          | -2.67 | -16.7 | 5.00E-04 | 10450904 |
|                  | <i>Sh11</i>          | -2.29 | -15.8 | 5.00E-04 | 10456423 |
|                  | <i>Serbpl</i>        | -2.63 | -11.5 | 0.001    | 10538857 |
|                  | <i>Shcpl</i>         | -3.79 | -9.2  | 0.002    | 10576883 |
|                  | <i>Shl1</i>          | -2.54 | -12.7 | 9.00E-04 | 10455912 |
|                  | <i>Slc39a10</i>      | -3.88 | -20.9 | 4.00E-04 | 10352389 |
|                  | <i>Smad5</i>         | -2.46 | -9.7  | 0.002    | 10405605 |
|                  | <i>Sns</i>           | -4.2  | -23.4 | 3.00E-04 | 10607524 |
|                  | <i>Smyd5</i>         | -3.2  | -17.5 | 5.00E-04 | 10539592 |
|                  | <i>Smo3</i>          | -2.82 | -18.4 | 4.00E-04 | 10364287 |
|                  | <i>Supt16h</i>       | -2.01 | -12.4 | 9.00E-04 | 10419611 |
|                  | <i>Tmem206</i>       | -2.05 | -15.1 | 6.00E-04 | 10352725 |
|                  | <i>Ubf1</i>          | -2.79 | -16   | 5.00E-04 | 10557139 |
|                  | <i>Usp14</i>         | -3.74 | -23.5 | 3.00E-04 | 10457409 |
|                  | <i>Vut1</i>          | -2.44 | -10.4 | 0.001    | 10391454 |
|                  | <i>Wee1</i>          | -5    | -16.4 | 5.00E-04 | 10556266 |
|                  | <i>Zbtb41</i>        | -2.2  | -12   | 0.001    | 10350377 |
|                  | <i>Zfp326</i>        | -2.52 | -13.5 | 8.00E-04 | 10523785 |
|                  | <i>Zfp367</i>        | -2.71 | -11.8 | 0.001    | 10410092 |
| mmu-miR-223 (↑)  | <i>Acl3</i>          | -2.29 | -14   | 7.00E-04 | 10347248 |
|                  | <i>Chx5</i>          | -4.33 | -12.9 | 8.00E-04 | 10433088 |
|                  | <i>Dusp2</i>         | -2.1  | -11.7 | 0.001    | 10475782 |
|                  | <i>Hsp90b1</i>       | -2.95 | -14.9 | 6.00E-04 | 10371482 |
|                  | <i>Ilt5a</i>         | -3.97 | -9.8  | 0.002    | 10407173 |
|                  | <i>Mt12</i>          | -2.13 | -13   | 8.00E-04 | 10389680 |
|                  | <i>Nuf2</i>          | -3.78 | -18.5 | 4.00E-04 | 10468531 |
|                  | <i>Onud4</i>         | -2.03 | -14.2 | 7.00E-04 | 10573027 |
|                  | <i>Pds5b</i>         | -2.68 | -14.9 | 6.00E-04 | 10527832 |
|                  | <i>Ralgs2</i>        | -2.08 | -8.7  | 0.003    | 10359201 |
|                  | <i>Sh3pxd2b</i>      | -2.08 | -13.8 | 7.00E-04 | 10375065 |
|                  | <i>Syncrip</i>       | -2.82 | -16.3 | 5.00E-04 | 10595604 |
|                  | <i>Ubc2q2</i>        | -2.01 | -6.3  | 0.007    | 10368227 |
|                  | <i>Uqc</i>           | -2.8  | -15.3 | 6.00E-04 | 10488944 |
| mmu-miR-503 (↑)  | <i>Akl1</i>          | -1.73 | -9.2  | 0.002    | 10506269 |
| mmu-miR-503* (↑) | <i>Bcl2</i>          | -2.88 | -20.7 | 4.00E-04 | 10357043 |
|                  | <i>Chx5</i>          | -4.33 | -12.9 | 8.00E-04 | 10433088 |
|                  | <i>Cend2</i>         | -2.71 | -11.6 | 0.001    | 10548105 |
|                  | <i>Chd9</i>          | -2.87 | -16.7 | 5.00E-04 | 10573353 |
|                  | <i>Chk1</i>          | -4.34 | -17.9 | 5.00E-04 | 10592201 |
|                  | <i>Eif4e</i>         | -2.32 | -12.4 | 9.00E-04 | 10496485 |
|                  | <i>Hnrnpa1</i>       | -1.87 | -8.4  | 0.003    | 10427885 |
|                  | <i>Kdsr</i>          | -2.12 | -13   | 8.00E-04 | 10357051 |
|                  | <i>Mvb</i>           | -3.49 | -19   | 4.00E-04 | 10368199 |
|                  | <i>Ocri</i>          | -3.21 | -19.7 | 4.00E-04 | 10599435 |
|                  | <i>Tmem93</i>        | -2.03 | -8.9  | 0.002    | 10388238 |
|                  | <i>Ubf1</i>          | -2.79 | -16   | 5.00E-04 | 10557139 |
|                  | <i>Wee1</i>          | -5    | -16.4 | 5.00E-04 | 10556266 |
|                  | <i>Zbtb41</i>        | -2.2  | -12   | 0.001    | 10350377 |
|                  | <i>Zfp367</i>        | -2.71 | -11.8 | 0.001    | 10410092 |
| mmu-miR-150 (↑)  | <i>4933439F18Rik</i> | -3.33 | -20.2 | 4.00E-04 | 10376596 |
|                  | <i>Eif4e</i>         | -2.32 | -12.4 | 9.00E-04 | 10496485 |
|                  | <i>Fbxo21</i>        | -2.23 | -13.4 | 8.00E-04 | 10524941 |

|                    |                       |       |          |          |          |
|--------------------|-----------------------|-------|----------|----------|----------|
|                    | <i>Myb</i>            | -3.49 | -19      | 4.00E-04 | 10368199 |
|                    | <i>Pdia3</i>          | -2.15 | -11.6    | 0.001    | 10475335 |
|                    | <i>Pdia6</i>          | -3.72 | -27.5    | 3.00E-04 | 10394735 |
|                    | <i>Pold3</i>          | -2.48 | -9.1     | 0.002    | 10565862 |
|                    | <i>Sephs1</i>         | -2.67 | -13.5    | 8.00E-04 | 10469035 |
| mmu-miR-340-5p (↑) | <i>4933403F05Rik</i>  | -2.74 | -18.5    | 4.00E-04 | 10459604 |
|                    | <i>Adrbk2</i>         | -2.12 | -8.5     | 0.003    | 10532630 |
|                    | <i>Amd1</i>           | -2.46 | -7.3     | 0.004    | 10538933 |
|                    | <i>Angpt1</i>         | -5    | -11      | 0.001    | 10428336 |
|                    | <i>Amhr10</i>         | -3.19 | -23.2    | 3.00E-04 | 10577048 |
|                    | <i>Anp32e</i>         | -3.84 | -14.7    | 6.00E-04 | 10494322 |
|                    | <i>Asf1a</i>          | -2.82 | -20.5    | 4.00E-04 | 10363163 |
|                    | <i>Canx</i>           | -2.83 | -12.9    | 8.00E-04 | 10385599 |
|                    | <i>Ccdc50</i>         | -2.76 | -11.1    | 0.001    | 10434869 |
|                    | <i>Ccdc88a</i>        | -2.57 | -14.1    | 7.00E-04 | 10374842 |
|                    | <i>Creld2</i>         | -2.34 | -11.3    | 0.001    | 10426098 |
|                    | <i>Dio2</i>           | -2.78 | -20.4    | 4.00E-04 | 10401841 |
|                    | <i>Dnajc11</i>        | -2.63 | -18.6    | 4.00E-04 | 10510604 |
|                    | <i>Dnajc2</i>         | -2.11 | -11      | 0.001    | 10528340 |
|                    | <i>Dusp2</i>          | -2.1  | -11.7    | 0.001    | 10475782 |
|                    | <i>Eif3f</i>          | -2.69 | -15.3    | 6.00E-04 | 10473405 |
|                    | <i>Enoph1</i>         | -2.35 | -17.3    | 5.00E-04 | 10523518 |
|                    | <i>Fbxo21</i>         | -2.23 | -13.4    | 8.00E-04 | 10524941 |
|                    | <i>Gemin5</i>         | -2.45 | -12.9    | 8.00E-04 | 10386125 |
|                    | <i>Glice</i>          | -2.4  | -12.7    | 9.00E-04 | 10594289 |
|                    | <i>Golt1b</i>         | -3.09 | -21.1    | 4.00E-04 | 10542650 |
|                    | <i>Grb10</i>          | -2.17 | -13.6    | 7.00E-04 | 10384398 |
|                    | <i>Gsp11</i>          | -3.41 | -13.8    | 7.00E-04 | 10437748 |
|                    | <i>Heatr3</i>         | -3.47 | -18.7    | 4.00E-04 | 10573713 |
|                    | <i>Hs2st1</i>         | -2.48 | -7.5     | 0.004    | 10502522 |
|                    | <i>Hspe1</i>          | -3.77 | -18.1    | 5.00E-04 | 10455588 |
|                    | <i>Ide</i>            | -5.16 | -19.1    | 4.00E-04 | 10467230 |
|                    | <i>Ikef2</i>          | -2.23 | -12      | 0.001    | 10355312 |
|                    | <i>Kdele1</i>         | -4.29 | -16      | 5.00E-04 | 10354286 |
|                    | <i>Kit</i>            | -2.77 | -9.3     | 0.002    | 10522530 |
|                    | <i>Lphn2</i>          | -3.25 | -14.7    | 6.00E-04 | 10502780 |
|                    | <i>Mat2a</i>          | -3.23 | -17.4    | 5.00E-04 | 10545417 |
|                    | <i>Memo1</i>          | -2.96 | -17.3    | 5.00E-04 | 10452860 |
|                    | <i>Noto2</i>          | -2.84 | -12.1    | 0.001    | 10580382 |
|                    | <i>Npat</i>           | -2.68 | -12.7    | 9.00E-04 | 10585358 |
|                    | <i>Pdk11</i>          | -2.12 | -15.5    | 6.00E-04 | 10517243 |
|                    | <i>Pds5b</i>          | -2.68 | -14.9    | 6.00E-04 | 10527832 |
|                    | <i>Phf17</i>          | -2.36 | -16.3    | 5.00E-04 | 10491860 |
|                    | <i>Plk1</i>           | -2.86 | -8.8     | 0.002    | 10557156 |
|                    | <i>Ptpn4</i>          | -3.3  | -20.9    | 4.00E-04 | 10364518 |
|                    | <i>Qsox1</i>          | -4.99 | -36.7    | 3.00E-04 | 10485622 |
|                    | <i>Ranbp1</i>         | -4.64 | -25.3    | 3.00E-04 | 10438308 |
|                    | <i>Rif1</i>           | -4.16 | -27.1    | 3.00E-04 | 10472058 |
|                    | <i>Scoc</i>           | -2.67 | -16.7    | 5.00E-04 | 10450904 |
|                    | <i>Sephs1</i>         | -2.67 | -13.5    | 8.00E-04 | 10469035 |
|                    | <i>Serbp1</i>         | -2.63 | -11.5    | 0.001    | 10538857 |
|                    | <i>Shp2</i>           | -2.97 | -21.9    | 4.00E-04 | 10427606 |
|                    | <i>Slc43a1</i>        | -2.47 | -9.7     | 0.002    | 10473367 |
| <i>Smarca4l1</i>   | -3.33                 | -15   | 6.00E-04 | 10538755 |          |
| <i>Sm</i>          | -5.13                 | -23.5 | 3.00E-04 | 10510391 |          |
| <i>Ssbp2</i>       | -2.2                  | -8.1  | 0.003    | 10406551 |          |
| <i>Syncrip</i>     | -2.82                 | -16.3 | 5.00E-04 | 10595604 |          |
| <i>Tcp1</i>        | -4.01                 | -20.9 | 4.00E-04 | 10441797 |          |
| <i>Thoc1</i>       | -3.3                  | -16.5 | 5.00E-04 | 10453766 |          |
| <i>Tomm40</i>      | -2.66                 | -14.6 | 6.00E-04 | 10560630 |          |
| <i>Ube2v2</i>      | -2.02                 | -10.5 | 0.001    | 10437942 |          |
| <i>Uip15</i>       | -3.05                 | -18   | 5.00E-04 | 10411432 |          |
| <i>Xpot</i>        | -3.65                 | -16.1 | 5.00E-04 | 10372877 |          |
| <i>Zfp664</i>      | -2.14                 | -15   | 6.00E-04 | 10525877 |          |
| mmu-miR-16 (↑)     | <i>13100001101Rik</i> | -3.87 | -21.5    | 4.00E-04 | 10378453 |
| mmu-miR-16* (↑)    | <i>Ak311</i>          | -1.73 | -9.2     | 0.002    | 10506269 |
|                    | <i>Akt3</i>           | -2.59 | -15      | 6.00E-04 | 10360506 |
|                    | <i>Atp5g1</i>         | -2.81 | -16.4    | 5.00E-04 | 10391100 |
|                    | <i>Bace1</i>          | -2.14 | -15.4    | 6.00E-04 | 10584941 |
|                    | <i>Bcl2</i>           | -2.88 | -20.7    | 4.00E-04 | 10357043 |
|                    | <i>Cbx5</i>           | -4.33 | -12.9    | 8.00E-04 | 10433088 |
|                    | <i>Cend2</i>          | -2.71 | -11.6    | 0.001    | 10548105 |
|                    | <i>Cene1</i>          | -2.12 | -12.3    | 9.00E-04 | 10562563 |
|                    | <i>Cdc25a</i>         | -2.08 | -8.4     | 0.003    | 10589420 |
|                    | <i>Chd9</i>           | -2.87 | -16.7    | 5.00E-04 | 10573823 |
|                    | <i>Chk1</i>           | -4.34 | -17.9    | 5.00E-04 | 10592201 |
|                    | <i>Cops7a</i>         | -2.31 | -12.9    | 8.00E-04 | 10547926 |
|                    | <i>Eif2s1</i>         | -3.46 | -19.2    | 4.00E-04 | 10396795 |
|                    | <i>Eif4e</i>          | -2.32 | -12.4    | 9.00E-04 | 10496485 |
|                    | <i>Epha7</i>          | -2.82 | -13.3    | 8.00E-04 | 10503659 |
|                    | <i>Fbxo21</i>         | -2.23 | -13.4    | 8.00E-04 | 10524941 |
|                    | <i>Fkbp1a</i>         | -2.11 | -13.2    | 8.00E-04 | 10477012 |
|                    | <i>Gra2</i>           | -2.73 | -18.5    | 4.00E-04 | 10567626 |
|                    | <i>Gpm1</i>           | -3.05 | -15.9    | 5.00E-04 | 10520800 |
|                    | <i>Hif1</i>           | -3.2  | -20.2    | 4.00E-04 | 10493086 |
|                    | <i>Hnga1</i>          | -2.84 | -14.9    | 6.00E-04 | 10383479 |
|                    | <i>Htrnpa1</i>        | -1.87 | -8.4     | 0.003    | 10427885 |
|                    | <i>Iso1</i>           | -2.92 | -16.4    | 5.00E-04 | 10455912 |
|                    | <i>Kdsr</i>           | -2.12 | -13      | 8.00E-04 | 10357051 |
|                    | <i>Lphn2</i>          | -3.25 | -14.7    | 6.00E-04 | 10502780 |
|                    | <i>Myb</i>            | -3.49 | -19      | 4.00E-04 | 10368199 |
|                    | <i>Nup210</i>         | -3.84 | -22.5    | 3.00E-04 | 10546294 |
|                    | <i>Ocr1</i>           | -3.21 | -19.7    | 4.00E-04 | 10599435 |
|                    | <i>Omd4</i>           | -2.03 | -14.2    | 7.00E-04 | 10573027 |
|                    | <i>Pdcd4</i>          | -2.55 | -16.7    | 5.00E-04 | 10463997 |
|                    | <i>Pdia6</i>          | -3.72 | -27.5    | 3.00E-04 | 10394735 |
|                    | <i>Pdk11</i>          | -2.12 | -15.5    | 6.00E-04 | 10517243 |
|                    | <i>Ptpn4</i>          | -3.07 | -22      | 4.00E-04 | 10357191 |
|                    | <i>Rad23b</i>         | -2.05 | -12.3    | 9.00E-04 | 10565092 |
|                    | <i>Scoc</i>           | -2.67 | -16.7    | 5.00E-04 | 10450904 |
|                    | <i>Sek11</i>          | -2.29 | -15.8    | 5.00E-04 | 10456423 |
|                    | <i>Serbp1</i>         | -2.63 | -11.5    | 0.001    | 10538857 |
|                    | <i>Shebp1</i>         | -3.79 | -9.2     | 0.002    | 10576883 |
|                    | <i>Sit1</i>           | -2.54 | -12.7    | 9.00E-04 | 10458251 |
|                    | <i>Slc39a10</i>       | -3.88 | -20.9    | 4.00E-04 | 10354389 |
|                    | <i>Smad5</i>          | -2.46 | -9.7     | 0.002    | 10405605 |
|                    | <i>Sms</i>            | -4.2  | -23.4    | 3.00E-04 | 10607524 |
|                    | <i>Smyd5</i>          | -3.2  | -17.5    | 5.00E-04 | 10539592 |
|                    | <i>Sumo3</i>          | -2.82 | -18.4    | 4.00E-04 | 10364287 |
|                    | <i>Sup16h</i>         | -2.01 | -12.4    | 9.00E-04 | 10419611 |
|                    | <i>Tmem206</i>        | -2.05 | -15.1    | 6.00E-04 | 10352725 |
|                    | <i>Ubf1</i>           | -2.79 | -16      | 5.00E-04 | 10557139 |
|                    | <i>Usp14</i>          | -3.74 | -23.5    | 3.00E-04 | 10457409 |
| <i>Utl1</i>        | -2.44                 | -10.4 | 0.001    | 10391454 |          |
| <i>Wef1</i>        | -5                    | -16.4 | 5.00E-04 | 10556266 |          |
| <i>Zbtb41</i>      | -2.2                  | -12   | 0.001    | 10520377 |          |
| <i>Zfp326</i>      | -2.52                 | -13.5 | 8.00E-04 | 10523785 |          |
| <i>Zfp367</i>      | -2.71                 | -11.8 | 0.001    | 10410092 |          |
| mmu-miR-195 (↑)    | <i>13100001101Rik</i> | -3.87 | -21.5    | 4.00E-04 | 10378453 |
| <i>Ak311</i>       | -1.73                 | -9.2  | 0.002    | 10506269 |          |
| <i>Akt3</i>        | -2.59                 | -15   | 6.00E-04 | 10360506 |          |
| <i>Atp5g1</i>      | -2.81                 | -16.4 | 5.00E-04 | 10391100 |          |
| <i>Bace1</i>       | -2.14                 | -15.4 | 6.00E-04 | 10584941 |          |
| <i>Bcl2</i>        | -2.88                 | -20.7 | 4.00E-04 | 10357043 |          |
| <i>Cbx5</i>        | -4.33                 | -12.9 | 8.00E-04 | 10433088 |          |
| <i>Cend2</i>       | -2.71                 | -11.6 | 0.001    | 10548105 |          |
| <i>Cene1</i>       | -2.12                 | -12.3 | 9.00E-04 | 10562563 |          |
| <i>Cdc25a</i>      | -2.08                 | -8.4  | 0.003    | 10589420 |          |
| <i>Chd9</i>        | -2.87                 | -16.7 | 5.00E-04 | 10573823 |          |
| <i>Chk1</i>        | -4.34                 | -17.9 | 5.00E-04 | 10592201 |          |

|                  |                      |       |       |          |          |
|------------------|----------------------|-------|-------|----------|----------|
|                  | <i>Cops7a</i>        | -2.31 | -12.9 | 8.00E-04 | 10547926 |
|                  | <i>Eif2s1</i>        | -3.46 | -19.2 | 4.00E-04 | 10396795 |
|                  | <i>Eif4e</i>         | -2.32 | -12.4 | 9.00E-04 | 10496485 |
|                  | <i>Epha7</i>         | -2.82 | -13.3 | 8.00E-04 | 10503659 |
|                  | <i>Fhso21</i>        | -2.23 | -13.4 | 8.00E-04 | 10524941 |
|                  | <i>Fkbp1a</i>        | -2.11 | -13.2 | 8.00E-04 | 10472012 |
|                  | <i>Gra2</i>          | -2.73 | -18.5 | 4.00E-04 | 10567626 |
|                  | <i>Gpm1</i>          | -3.05 | -15.9 | 5.00E-04 | 10521080 |
|                  | <i>Helgf</i>         | -3.2  | -20.2 | 4.00E-04 | 10493086 |
|                  | <i>Hmgal</i>         | -2.84 | -14.9 | 6.00E-04 | 10383479 |
|                  | <i>Htrmp1</i>        | -1.87 | -8.4  | 0.003    | 10427885 |
|                  | <i>Isoe1</i>         | -2.92 | -16.4 | 5.00E-04 | 10455912 |
|                  | <i>Kdsr</i>          | -2.12 | -13   | 8.00E-04 | 10357051 |
|                  | <i>Lphn2</i>         | -3.25 | -14.7 | 6.00E-04 | 10502780 |
|                  | <i>Myb</i>           | -3.49 | -19   | 4.00E-04 | 10368199 |
|                  | <i>Nup210</i>        | -3.84 | -22.5 | 3.00E-04 | 10546294 |
|                  | <i>Ocr1</i>          | -3.21 | -19.7 | 4.00E-04 | 10599435 |
|                  | <i>Onu4</i>          | -2.03 | -14.2 | 7.00E-04 | 10573027 |
|                  | <i>Pdc4</i>          | -2.55 | -16.7 | 5.00E-04 | 10463997 |
|                  | <i>Pdia6</i>         | -3.72 | -27.5 | 3.00E-04 | 10394735 |
|                  | <i>Pdk11</i>         | -2.12 | -15.5 | 6.00E-04 | 10517243 |
|                  | <i>Ppns1</i>         | -3.07 | -22   | 4.00E-04 | 10357191 |
|                  | <i>Rad23b</i>        | -2.05 | -12.3 | 9.00E-04 | 10505092 |
|                  | <i>Scoc</i>          | -2.67 | -16.7 | 5.00E-04 | 10450904 |
|                  | <i>Seh1</i>          | -2.29 | -15.8 | 5.00E-04 | 10456423 |
|                  | <i>Serbp1</i>        | -2.63 | -11.5 | 0.001    | 10538857 |
|                  | <i>Shcp1</i>         | -3.79 | -9.2  | 0.002    | 10576883 |
|                  | <i>Sil1</i>          | -2.54 | -12.7 | 9.00E-04 | 10458251 |
|                  | <i>Slc39a10</i>      | -3.88 | -20.9 | 4.00E-04 | 10354389 |
|                  | <i>Smad5</i>         | -2.46 | -9.7  | 0.002    | 10405605 |
|                  | <i>Sms</i>           | -4.2  | -23.4 | 3.00E-04 | 10607524 |
|                  | <i>Smyd5</i>         | -3.2  | -17.5 | 5.00E-04 | 10539592 |
|                  | <i>Sumo3</i>         | -2.82 | -18.4 | 4.00E-04 | 10364287 |
|                  | <i>Supt16h</i>       | -2.01 | -12.4 | 9.00E-04 | 10419611 |
|                  | <i>Tmem206</i>       | -2.05 | -15.1 | 6.00E-04 | 10352725 |
|                  | <i>Ubf1</i>          | -2.79 | -16   | 5.00E-04 | 10552159 |
|                  | <i>Usp14</i>         | -3.74 | -23.5 | 3.00E-04 | 10457409 |
|                  | <i>Utl1</i>          | -2.44 | -10.4 | 0.001    | 10391454 |
|                  | <i>Wee1</i>          | -5    | -16.4 | 5.00E-04 | 10556266 |
|                  | <i>Zbtb41</i>        | -2.2  | -12   | 0.001    | 10350377 |
|                  | <i>Zfp326</i>        | -2.52 | -13.5 | 8.00E-04 | 10523785 |
|                  | <i>Zfp367</i>        | -2.71 | -11.8 | 0.001    | 10410092 |
| mmu-miR-30a (↑)  | <i>Abl2</i>          | -2.53 | -15.4 | 6.00E-04 | 10346764 |
| mmu-miR-30b (↑)  | <i>Atp2a2</i>        | -3.07 | -14.4 | 7.00E-04 | 10533483 |
| mmu-miR-30c (↑)  | <i>B230208H17Rik</i> | -2.39 | -15.5 | 6.00E-04 | 10480813 |
| mmu-miR-30d (↑)  | <i>B3gnt5</i>        | -3.35 | -21.5 | 4.00E-04 | 10434291 |
| mmu-miR-30e (↑)  | <i>Bcl2</i>          | -2.88 | -20.7 | 4.00E-04 | 10357043 |
| mmu-miR-30e* (↑) | <i>Bcor</i>          | -2.1  | -12   | 0.001    | 10603627 |
| mmu-miR-30e* (↑) | <i>Calu</i>          | -3.7  | -18.1 | 5.00E-04 | 10536818 |
| mmu-miR-30e* (↑) | <i>Cand1</i>         | -2.37 | -16.9 | 5.00E-04 | 10372750 |
|                  | <i>Ccne2</i>         | -2.7  | -6.7  | 0.006    | 10303264 |
|                  | <i>Ccnf</i>          | -2.88 | -9.2  | 0.002    | 10443506 |
|                  | <i>Ddx19b</i>        | -2.21 | -10.5 | 0.001    | 10581737 |
|                  | <i>Dio2</i>          | -2.78 | -20.4 | 4.00E-04 | 10401841 |
|                  | <i>Dock7</i>         | -2.62 | -13.6 | 7.00E-04 | 10514590 |
|                  | <i>Dys19l1</i>       | -3.78 | -20.8 | 4.00E-04 | 10591816 |
|                  | <i>Dpysl2</i>        | -2.47 | -16.7 | 5.00E-04 | 10420988 |
|                  | <i>Efr3a</i>         | -2.13 | -14.3 | 7.00E-04 | 10424459 |
|                  | <i>Elov5</i>         | -2.94 | -17.9 | 5.00E-04 | 10587284 |
|                  | <i>Eml4</i>          | -2.12 | -15   | 6.00E-04 | 10447141 |
|                  | <i>Etaal1</i>        | -3.18 | -23.1 | 3.00E-04 | 10384486 |
|                  | <i>Fyn</i>           | -2.13 | -11.3 | 0.001    | 10362596 |
|                  | <i>Gatm</i>          | -4.45 | -19.5 | 4.00E-04 | 10487011 |
|                  | <i>Gcle</i>          | -3.34 | -23.8 | 3.00E-04 | 10587266 |
|                  | <i>Glee</i>          | -2.4  | -12.7 | 9.00E-04 | 10594289 |
|                  | <i>Grb10</i>         | -2.17 | -13.6 | 7.00E-04 | 10384398 |
|                  | <i>Ide</i>           | -5.16 | -19.1 | 4.00E-04 | 10462230 |
|                  | <i>Irf2</i>          | -2.23 | -12   | 0.001    | 10355212 |
|                  | <i>Isg20l2</i>       | -2.86 | -17.2 | 5.00E-04 | 10493103 |
|                  | <i>Ivsn1abp</i>      | -2.98 | -21.6 | 4.00E-04 | 10350594 |
|                  | <i>Lamp4</i>         | -2.02 | -13   | 8.00E-04 | 10426827 |
|                  | <i>Mat2a</i>         | -3.23 | -17.4 | 5.00E-04 | 10545417 |
|                  | <i>Mboat1</i>        | -2.73 | -17.2 | 5.00E-04 | 10404359 |
|                  | <i>Msi2</i>          | -2.13 | -13   | 8.00E-04 | 10389680 |
|                  | <i>Mat1</i>          | -3.12 | -14.6 | 6.00E-04 | 10398972 |
|                  | <i>Mthfd1l</i>       | -3.63 | -18.9 | 4.00E-04 | 10367641 |
|                  | <i>Myb12</i>         | -3.02 | -11.7 | 0.001    | 10478355 |
|                  | <i>Ogfod1</i>        | -2.01 | -13.6 | 7.00E-04 | 10573998 |
|                  | <i>Orc2l</i>         | -4.15 | -17.6 | 5.00E-04 | 10354845 |
|                  | <i>P4ha1</i>         | -2.05 | -9.8  | 0.002    | 10363350 |
|                  | <i>Pdgfrb</i>        | -2.01 | -6.2  | 0.008    | 10456046 |
|                  | <i>Pdss1</i>         | -2.3  | -16.6 | 5.00E-04 | 10469712 |
|                  | <i>Pfif2</i>         | -2.46 | -13.9 | 7.00E-04 | 10528238 |
|                  | <i>Palr3e</i>        | -3.75 | -19.6 | 4.00E-04 | 10557025 |
|                  | <i>Palr3g</i>        | -2.06 | -9    | 0.002    | 10410877 |
|                  | <i>Ppid</i>          | -2.81 | -11.8 | 0.001    | 10492671 |
|                  | <i>Ppp2r1b</i>       | -2.14 | -13.2 | 8.00E-04 | 10585249 |
|                  | <i>Psmd7</i>         | -3.37 | -13.5 | 8.00E-04 | 10581560 |
|                  | <i>Rab38</i>         | -3.77 | -14.3 | 7.00E-04 | 10554800 |
|                  | <i>Rad23b</i>        | -2.05 | -12.3 | 9.00E-04 | 10505092 |
|                  | <i>Ramt</i>          | -2.83 | -15.8 | 5.00E-04 | 10456501 |
|                  | <i>Rqccl</i>         | -2.57 | -15.2 | 6.00E-04 | 10347386 |
|                  | <i>Rwdd4a</i>        | -2.46 | -16.8 | 5.00E-04 | 10571728 |
|                  | <i>Scyl3</i>         | -3.24 | -14.4 | 7.00E-04 | 10359648 |
|                  | <i>Sdad1</i>         | -4.51 | -17.8 | 5.00E-04 | 10531383 |
|                  | <i>Sec61a2</i>       | -2.12 | -9.4  | 0.002    | 10479887 |
|                  | <i>Sfrs7</i>         | -2.54 | -11.5 | 0.001    | 10453102 |
|                  | <i>Sgcb</i>          | -2.38 | -10.1 | 0.002    | 10539633 |
|                  | <i>Slp2</i>          | -2.97 | -21.9 | 4.00E-04 | 10427606 |
|                  | <i>Slc7a6</i>        | -3.96 | -19.8 | 4.00E-04 | 10574955 |
|                  | <i>Snc30</i>         | -2.4  | -11.4 | 0.001    | 10505224 |
|                  | <i>Spec3</i>         | -2.72 | -19.9 | 4.00E-04 | 10578703 |
|                  | <i>Ssbp2</i>         | -2.2  | -8.1  | 0.003    | 10406551 |
|                  | <i>Tusc3</i>         | -2.53 | -15.4 | 6.00E-04 | 10571371 |
|                  | <i>Ube2v2</i>        | -2.02 | -10.5 | 0.001    | 10437942 |
|                  | <i>Usp14</i>         | -3.74 | -23.5 | 3.00E-04 | 10457409 |
|                  | <i>Vut1</i>          | -2.44 | -10.4 | 0.001    | 10391454 |
|                  | <i>Zbtb41</i>        | -2.2  | -12   | 0.001    | 10350377 |
|                  | <i>Zdhc21</i>        | -4.06 | -24.9 | 3.00E-04 | 10514072 |
|                  | <i>Zfp706</i>        | -2.42 | -11   | 0.001    | 10349049 |
| mmu-miR-29a (↑)  | <i>4933439F18Rik</i> | -3.33 | -20.2 | 4.00E-04 | 10376596 |
| mmu-miR-29c (↑)  | <i>Abce1</i>         | -4.57 | -19.9 | 4.00E-04 | 10579874 |
|                  | <i>Akt3</i>          | -2.59 | -15   | 6.00E-04 | 10360506 |
|                  | <i>Ankrd49</i>       | -2.66 | -16.8 | 5.00E-04 | 10590968 |
|                  | <i>Ap3g1</i>         | -2.81 | -16.4 | 5.00E-04 | 10391160 |
|                  | <i>Bimb</i>          | -2.46 | -16.7 | 5.00E-04 | 10378802 |
|                  | <i>Clec5</i>         | -4.33 | -12.9 | 8.00E-04 | 10433088 |
|                  | <i>Ccdc88a</i>       | -2.57 | -14.1 | 7.00E-04 | 10374842 |
|                  | <i>Cend2</i>         | -2.71 | -11.6 | 0.001    | 10548105 |
|                  | <i>Cep97</i>         | -3.23 | -11.4 | 0.001    | 10439960 |
|                  | <i>Csda</i>          | -4.22 | -29.9 | 3.00E-04 | 10548585 |
|                  | <i>Ctnd1</i>         | -3.11 | -16   | 5.00E-04 | 10484402 |
|                  | <i>Dbt</i>           | -2.29 | -15.4 | 6.00E-04 | 10495549 |
|                  | <i>Dio2</i>          | -2.78 | -20.4 | 4.00E-04 | 10401841 |
|                  | <i>Dpysl2</i>        | -2.47 | -16.7 | 5.00E-04 | 10420988 |
|                  | <i>Dusp2</i>         | -2.1  | -11.7 | 0.001    | 10475782 |
|                  | <i>Eif3j</i>         | -2.69 | -15.3 | 6.00E-04 | 10475405 |
|                  | <i>Eml4</i>          | -2.12 | -15   | 6.00E-04 | 10447141 |
|                  | <i>Fem1b</i>         | -2.39 | -15.1 | 6.00E-04 | 10594315 |
|                  | <i>Impd1</i>         | -2.36 | -9.2  | 0.002    | 10543572 |

|                    |                      |       |       |          |          |
|--------------------|----------------------|-------|-------|----------|----------|
|                    | <i>Igfb1</i>         | -2.14 | -9.4  | 0.002    | 10576661 |
|                    | <i>Kbtbd8</i>        | -2.03 | -10.2 | 0.002    | 10540227 |
|                    | <i>Kdele1</i>        | -4.29 | -16   | 5.00E-04 | 10354286 |
|                    | <i>Larp4</i>         | -2.02 | -13   | 8.00E-04 | 10426827 |
|                    | <i>Map2k6</i>        | -2.39 | -14.2 | 7.00E-04 | 10382300 |
|                    | <i>Metap2</i>        | -2.38 | -16   | 5.00E-04 | 10371987 |
|                    | <i>Mylb2</i>         | -3.02 | -11.7 | 0.001    | 10478355 |
|                    | <i>Nasip</i>         | -3.46 | -19.5 | 4.00E-04 | 10515337 |
|                    | <i>Nkr1</i>          | -3.22 | -18.5 | 4.00E-04 | 10604053 |
|                    | <i>Nup160</i>        | -2.78 | -19   | 4.00E-04 | 10473650 |
|                    | <i>Onsd4</i>         | -2.03 | -14.2 | 7.00E-04 | 10573027 |
|                    | <i>Oxct1</i>         | -3.22 | -17.3 | 5.00E-04 | 10422608 |
|                    | <i>Pdgfrb</i>        | -2.01 | -6.2  | 0.008    | 10456046 |
|                    | <i>Pdxc</i>          | -2.35 | -12.7 | 9.00E-04 | 10485429 |
|                    | <i>Pdik11</i>        | -2.12 | -15.5 | 6.00E-04 | 10517243 |
|                    | <i>Ppic</i>          | -2.59 | -6.8  | 0.006    | 10458906 |
|                    | <i>Sestd1</i>        | -2.95 | -18   | 5.00E-04 | 10484227 |
|                    | <i>Slc16a1</i>       | -4.21 | -25.4 | 3.00E-04 | 10495055 |
|                    | <i>Slc7a1</i>        | -2.31 | -13.8 | 7.00E-04 | 10535852 |
|                    | <i>Sms</i>           | -4.2  | -23.4 | 3.00E-04 | 10607524 |
|                    | <i>Syncrip</i>       | -2.82 | -16.3 | 5.00E-04 | 10595664 |
|                    | <i>Tefec</i>         | -4.64 | -22.9 | 3.00E-04 | 10543239 |
|                    | <i>Thoc1</i>         | -3.3  | -16.5 | 5.00E-04 | 10453766 |
|                    | <i>Trim37</i>        | -3.62 | -23.1 | 3.00E-04 | 10379998 |
|                    | <i>Tspan4</i>        | -3.17 | -17.4 | 5.00E-04 | 10558961 |
|                    | <i>Ubfid1</i>        | -2.79 | -16   | 5.00E-04 | 10557139 |
|                    | <i>Xpmppe1</i>       | -2.37 | -10   | 0.002    | 10468489 |
|                    | <i>Zbtb41</i>        | -2.2  | -12   | 0.001    | 10350377 |
|                    | <i>Zdhc21</i>        | -4.06 | -24.9 | 3.00E-04 | 10514072 |
|                    | <i>Zfp113</i>        | -2.1  | -10.5 | 0.001    | 10534966 |
| mmu-miR-140 (↑)    | <i>Calu</i>          | -3.7  | -18.1 | 5.00E-04 | 10536818 |
|                    | <i>Dpysl2</i>        | -2.47 | -16.7 | 5.00E-04 | 10420988 |
|                    | <i>Hs2s1</i>         | -2.48 | -7.5  | 0.004    | 10502522 |
|                    | <i>Rad54l2</i>       | -2.21 | -7.6  | 0.004    | 10596543 |
|                    | <i>Slc30a5</i>       | -2.79 | -15.8 | 5.00E-04 | 10411751 |
| mmu-miR-142-3p (↑) | <i>BC016423</i>      | -2.86 | -20.1 | 4.00E-04 | 10407392 |
|                    | <i>Eml4</i>          | -2.12 | -15   | 6.00E-04 | 10447141 |
|                    | <i>Foxm1</i>         | -2.02 | -7.4  | 0.004    | 10542059 |
|                    | <i>Gata2l3</i>       | -3.03 | -12   | 0.001    | 10371720 |
|                    | <i>Grl1</i>          | -2.03 | -14.9 | 6.00E-04 | 10521234 |
|                    | <i>Iloft</i>         | -3.97 | -9.8  | 0.002    | 10407173 |
|                    | <i>Lrrc59</i>        | -2.68 | -17.2 | 5.00E-04 | 10380403 |
|                    | <i>Msi2</i>          | -2.13 | -13   | 8.00E-04 | 10389680 |
|                    | <i>Slpr3</i>         | -2.43 | -14.1 | 7.00E-04 | 10405179 |
|                    | <i>Slc39a10</i>      | -3.88 | -20.9 | 4.00E-04 | 10354389 |
|                    | <i>Usp6nl</i>        | -2.57 | -18.6 | 4.00E-04 | 10469110 |
|                    | <i>Zbtb41</i>        | -2.2  | -12   | 0.001    | 10350377 |
| mmu-miR-103 (↑)    | <i>Ak311</i>         | -1.73 | -9.2  | 0.002    | 10506269 |
|                    | <i>Cdc6</i>          | -3.33 | -20.9 | 4.00E-04 | 10381072 |
|                    | <i>Cdk6</i>          | -4.23 | -29.9 | 3.00E-04 | 10519324 |
|                    | <i>Ctmd1</i>         | -3.11 | -16   | 5.00E-04 | 10484402 |
|                    | <i>Elovl6</i>        | -3    | -11.1 | 0.001    | 10495993 |
|                    | <i>Fubp1</i>         | -2.95 | -19.6 | 4.00E-04 | 10496892 |
|                    | <i>Gnmpat1</i>       | -3.55 | -16.5 | 5.00E-04 | 10419216 |
|                    | <i>Hmgcl</i>         | -2.84 | -14.9 | 6.00E-04 | 10383429 |
|                    | <i>Msi2</i>          | -2.13 | -13   | 8.00E-04 | 10389680 |
|                    | <i>Onsd4</i>         | -2.03 | -14.2 | 7.00E-04 | 10573027 |
|                    | <i>Polkln2</i>       | -2.38 | -11.6 | 0.001    | 10379204 |
|                    | <i>Piprs4</i>        | -3.07 | -22   | 4.00E-04 | 10357191 |
|                    | <i>Ran</i>           | -3.55 | -25.7 | 3.00E-04 | 10525983 |
|                    | <i>Rnmt</i>          | -2.83 | -15.8 | 5.00E-04 | 10456501 |
|                    | <i>Sms</i>           | -4.2  | -23.4 | 3.00E-04 | 10607524 |
|                    | <i>Tmem206</i>       | -2.05 | -15.1 | 6.00E-04 | 10352725 |
|                    | <i>Usp14</i>         | -3.74 | -23.5 | 3.00E-04 | 10457409 |
|                    | <i>Zc3h7b</i>        | -2.12 | -14.8 | 6.00E-04 | 10425578 |
|                    | <i>Zfp326</i>        | -2.52 | -13.5 | 8.00E-04 | 10523785 |
| mmu-miR-192 (↑)    | <i>Cdc6</i>          | -3.33 | -20.9 | 4.00E-04 | 10381072 |
|                    | <i>Dbi</i>           | -2.29 | -15.4 | 6.00E-04 | 10495549 |
| mmu-miR-24 (↑)     | <i>Aars</i>          | -2.48 | -12.6 | 9.00E-04 | 10575550 |
|                    | <i>B3gnt5</i>        | -3.35 | -21.5 | 4.00E-04 | 10434291 |
|                    | <i>Cbx3</i>          | -4.33 | -12.9 | 8.00E-04 | 10453088 |
|                    | <i>Ccl5f38</i>       | -2.64 | -10.9 | 0.001    | 10435589 |
|                    | <i>Ctcf</i>          | -4.78 | -14   | 7.00E-04 | 10493193 |
|                    | <i>Eml4</i>          | -2.12 | -15   | 6.00E-04 | 10447141 |
|                    | <i>Gria3</i>         | -6.15 | -27.8 | 3.00E-04 | 10599348 |
|                    | <i>Gipbp10</i>       | -2.27 | -12.3 | 9.00E-04 | 10578069 |
|                    | <i>H2afk</i>         | -3.15 | -15.9 | 5.00E-04 | 10584710 |
|                    | <i>Imnt</i>          | -2.88 | -20.9 | 4.00E-04 | 10539026 |
|                    | <i>Nfcl1</i>         | -2.05 | -14.9 | 6.00E-04 | 10530467 |
|                    | <i>Npat</i>          | -2.68 | -12.7 | 9.00E-04 | 10585358 |
|                    | <i>Sad1</i>          | -4.51 | -17.8 | 5.00E-04 | 10531383 |
|                    | <i>Skp2</i>          | -2.97 | -21.9 | 4.00E-04 | 10427606 |
|                    | <i>Spes3</i>         | -2.72 | -19.9 | 4.00E-04 | 10578703 |
|                    | <i>Tcerg1</i>        | -3.7  | -18   | 5.00E-04 | 10455346 |
|                    | <i>Whsc1</i>         | -2.55 | -18.6 | 4.00E-04 | 10521136 |
| mmu-miR-301a (↑)   | <i>1310001101Rik</i> | -3.87 | -21.5 | 4.00E-04 | 10578453 |
| mmu-miR-301b (↑)   | <i>Ak311</i>         | -3.01 | -13.6 | 7.00E-04 | 10472923 |
|                    | <i>Cxns</i>          | -2.83 | -12.9 | 8.00E-04 | 10385599 |
|                    | <i>Ctcf</i>          | -2.82 | -9.6  | 0.002    | 10543333 |
|                    | <i>Ctcf1</i>         | -2.01 | -6.1  | 0.008    | 10523563 |
|                    | <i>Cnih</i>          | -2.92 | -13.6 | 7.00E-04 | 10419267 |
|                    | <i>Dnm11</i>         | -2.23 | -15.4 | 6.00E-04 | 10437992 |
|                    | <i>Dpysl2</i>        | -2.47 | -16.7 | 5.00E-04 | 10420988 |
|                    | <i>Dynl12</i>        | -2.07 | -8.1  | 0.003    | 10389674 |
|                    | <i>Endod1</i>        | -2.34 | -15.1 | 6.00E-04 | 10590909 |
|                    | <i>Fubp1</i>         | -2.95 | -19.6 | 4.00E-04 | 10496892 |
|                    | <i>Gnmpat1</i>       | -3.55 | -16.5 | 5.00E-04 | 10419216 |
|                    | <i>Grb10</i>         | -2.17 | -13.6 | 7.00E-04 | 10384398 |
|                    | <i>Iloft</i>         | -3.97 | -9.8  | 0.002    | 10407173 |
|                    | <i>Impdh1</i>        | -2.36 | -9.2  | 0.002    | 10543572 |
|                    | <i>Ippr1</i>         | -3.21 | -19.8 | 4.00E-04 | 10540408 |
|                    | <i>Kit</i>           | -2.77 | -9.3  | 0.002    | 10523530 |
|                    | <i>Memo1</i>         | -2.96 | -17.3 | 5.00E-04 | 10452860 |
|                    | <i>Mylb</i>          | -3.49 | -19   | 4.00E-04 | 10368199 |
|                    | <i>Npat</i>          | -2.68 | -12.7 | 9.00E-04 | 10585358 |
|                    | <i>Nup35</i>         | -2.15 | -12.8 | 9.00E-04 | 10567131 |
|                    | <i>Pgm2l1</i>        | -2.73 | -12.2 | 0.001    | 10555303 |
|                    | <i>Pih17</i>         | -2.36 | -16.3 | 5.00E-04 | 10491860 |
|                    | <i>Qser1</i>         | -4.99 | -36.7 | 3.00E-04 | 10485622 |
|                    | <i>Rbbp8</i>         | -2.37 | -12.1 | 0.001    | 10453867 |
|                    | <i>Rpa2</i>          | -3.37 | -18.2 | 4.00E-04 | 10508759 |
|                    | <i>Rtcd1</i>         | -2.28 | -14   | 7.00E-04 | 10501649 |
|                    | <i>Sgcb</i>          | -2.38 | -10.1 | 0.002    | 10530633 |
|                    | <i>Smad5</i>         | -2.46 | -9.7  | 0.002    | 10405605 |
|                    | <i>Sws5</i>          | -2.87 | -14.7 | 6.00E-04 | 10488237 |
|                    | <i>Suv39h1</i>       | -3.45 | -19.6 | 4.00E-04 | 10603421 |
|                    | <i>Syncrip</i>       | -2.82 | -16.3 | 5.00E-04 | 10595664 |
|                    | <i>Trim37</i>        | -3.62 | -23.1 | 3.00E-04 | 10379998 |
|                    | <i>Zfp113</i>        | -2.1  | -10.5 | 0.001    | 10534966 |
|                    | <i>Zfp367</i>        | -2.71 | -11.8 | 0.001    | 10410092 |
| mmu-miR-27a (↑)    | <i>Ak311</i>         | -1.73 | -9.2  | 0.002    | 10506269 |
|                    | <i>Ccl5f38</i>       | -2.76 | -11.1 | 0.001    | 10434869 |
|                    | <i>Ctcf1</i>         | -2.01 | -6.1  | 0.008    | 10523563 |
|                    | <i>Ctpp</i>          | -3    | -16   | 5.00E-04 | 10446207 |
|                    | <i>Dynl12</i>        | -2.07 | -8.1  | 0.003    | 10389674 |
|                    | <i>E2f6</i>          | -3.47 | -14.7 | 6.00E-04 | 10394690 |
|                    | <i>Ej2s2</i>         | -2.06 | -10.9 | 0.001    | 10488806 |
|                    | <i>Fasn</i>          | -3.65 | -24.7 | 3.00E-04 | 10393970 |
|                    | <i>Fubp1</i>         | -2.95 | -19.6 | 4.00E-04 | 10496892 |
|                    | <i>Gata2</i>         | -2.63 | -12.4 | 9.00E-04 | 10539873 |

|                  |                      |       |       |          |          |
|------------------|----------------------|-------|-------|----------|----------|
|                  | <i>Gmps</i>          | -3.51 | -17.3 | 5.00E-04 | 10492381 |
|                  | <i>Gnpat1</i>        | -3.55 | -16.5 | 5.00E-04 | 10419216 |
|                  | <i>Gol1b</i>         | -3.09 | -21.1 | 4.00E-04 | 10542650 |
|                  | <i>Gpam</i>          | -2.11 | -13.9 | 7.00E-04 | 10468533 |
|                  | <i>Gria3</i>         | -6.15 | -27.8 | 3.00E-04 | 10599348 |
|                  | <i>Gsp1l</i>         | -3.41 | -13.8 | 7.00E-04 | 10437738 |
|                  | <i>Gt2l</i>          | -4.11 | -23.5 | 3.00E-04 | 10534216 |
|                  | <i>Hsp90aa1</i>      | -2.79 | -14.9 | 6.00E-04 | 10378848 |
|                  | <i>Hyou1</i>         | -3.32 | -22.5 | 3.00E-04 | 10584712 |
|                  | <i>Irf2</i>          | -2.23 | -12   | 0.001    | 10355312 |
|                  | <i>Kbtbd8</i>        | -2.03 | -10.2 | 0.002    | 10540222 |
|                  | <i>Ktcl1</i>         | -3.54 | -25.6 | 3.00E-04 | 10439471 |
|                  | <i>Larp4</i>         | -2.02 | -13   | 8.00E-04 | 10426837 |
|                  | <i>Limk1</i>         | -2.13 | -10.8 | 0.001    | 10534324 |
|                  | <i>Lphn2</i>         | -3.25 | -14.7 | 6.00E-04 | 10502780 |
|                  | <i>Man1a</i>         | -4.55 | -27.2 | 3.00E-04 | 10369154 |
|                  | <i>Mdn1</i>          | -2.77 | -18.6 | 4.00E-04 | 10503723 |
|                  | <i>Met</i>           | -4.45 | -13.7 | 7.00E-04 | 10536505 |
|                  | <i>Msi2</i>          | -2.13 | -13   | 8.00E-04 | 10389680 |
|                  | <i>Neto2</i>         | -2.84 | -12.1 | 0.001    | 10580382 |
|                  | <i>Pank1</i>         | -3.63 | -21.4 | 4.00E-04 | 10467162 |
|                  | <i>Phf5</i>          | -2.35 | -12.7 | 9.00E-04 | 10485429 |
|                  | <i>Pdia5</i>         | -2.81 | -16.2 | 5.00E-04 | 10439218 |
|                  | <i>Pds5b</i>         | -2.68 | -14.9 | 6.00E-04 | 10527832 |
|                  | <i>Pgm2l1</i>        | -2.73 | -12.2 | 0.001    | 10555303 |
|                  | <i>Phb</i>           | -2.3  | -10.8 | 0.001    | 10422776 |
|                  | <i>Ppf1</i>          | -2.24 | -13.4 | 8.00E-04 | 10413222 |
|                  | <i>Rad54l2</i>       | -2.21 | -7.6  | 0.004    | 10596543 |
|                  | <i>Rpn1</i>          | -2.63 | -16.5 | 5.00E-04 | 10539861 |
|                  | <i>Rpn2</i>          | -4.13 | -29.8 | 3.00E-04 | 10477946 |
|                  | <i>Snx30</i>         | -2.4  | -11.4 | 0.001    | 10505224 |
|                  | <i>Sirbp</i>         | -2.39 | -10.8 | 0.001    | 10482181 |
|                  | <i>Suclg2</i>        | -4.13 | -21.8 | 4.00E-04 | 10607497 |
|                  | <i>Tfam</i>          | -2.65 | -15.8 | 5.00E-04 | 10369867 |
|                  | <i>Uqc</i>           | -2.8  | -15.3 | 6.00E-04 | 10488944 |
| mmu-miR-328 (↑)  | <i>H2afz</i>         | -3.15 | -15.9 | 5.00E-04 | 10584710 |
|                  | <i>Rad23b</i>        | -2.05 | -12.3 | 9.00E-04 | 10505092 |
|                  | <i>Ubr1l</i>         | -2.79 | -16   | 5.00E-04 | 10557139 |
|                  | <i>Usp37</i>         | -2.69 | -18.6 | 4.00E-04 | 10355582 |
| mmu-miR-106b (↑) | <i>4933403F05Rik</i> | -2.74 | -18.5 | 4.00E-04 | 10458604 |
|                  | <i>4933439F18Rik</i> | -3.33 | -20.2 | 4.00E-04 | 10376596 |
|                  | <i>6030458C11Rik</i> | -2.78 | -18.5 | 4.00E-04 | 10427849 |
|                  | <i>Atk3</i>          | -2.59 | -15   | 6.00E-04 | 10360506 |
|                  | <i>Asf1a</i>         | -2.82 | -20.5 | 4.00E-04 | 10363163 |
|                  | <i>Asf1b</i>         | -2.99 | -9.1  | 0.002    | 10573261 |
|                  | <i>Atad2</i>         | -3.16 | -17   | 5.00E-04 | 10428763 |
|                  | <i>Brms1l</i>        | -2.2  | -15   | 6.00E-04 | 10395831 |
|                  | <i>C80913</i>        | -3.34 | -16.4 | 5.00E-04 | 10562548 |
|                  | <i>Cand1</i>         | -2.37 | -16.9 | 5.00E-04 | 10372750 |
|                  | <i>Ccdc50</i>        | -2.76 | -11.1 | 0.001    | 10434869 |
|                  | <i>Cend2</i>         | -2.71 | -11.6 | 0.001    | 10548105 |
|                  | <i>Cid69</i>         | -2.82 | -9.6  | 0.002    | 10548333 |
|                  | <i>Cdca7</i>         | -2.55 | -14.4 | 7.00E-04 | 10472916 |
|                  | <i>Cep97</i>         | -3.23 | -11.4 | 0.001    | 10439960 |
|                  | <i>Chd9</i>          | -2.87 | -16.7 | 5.00E-04 | 10573823 |
|                  | <i>Clic4</i>         | -2.18 | -9.1  | 0.002    | 10517336 |
|                  | <i>Dpysl2</i>        | -2.47 | -16.7 | 5.00E-04 | 10420988 |
|                  | <i>Dusp2</i>         | -2.1  | -11.7 | 0.001    | 10475782 |
|                  | <i>Ect2</i>          | -3.73 | -8.9  | 0.002    | 10497520 |
|                  | <i>Elov16</i>        | -3    | -11.1 | 0.001    | 10495993 |
|                  | <i>Epha7</i>         | -2.82 | -13.3 | 8.00E-04 | 10503659 |
|                  | <i>Fbxo21</i>        | -2.23 | -13.4 | 8.00E-04 | 10524941 |
|                  | <i>Glee1</i>         | -2.4  | -12.7 | 9.00E-04 | 10594289 |
|                  | <i>Hmgb3</i>         | -2.34 | -10.3 | 0.002    | 10600017 |
|                  | <i>Hs2st1</i>        | -2.48 | -7.5  | 0.004    | 10502522 |
|                  | <i>Irf2</i>          | -2.23 | -12   | 0.001    | 10355312 |
|                  | <i>Irfst</i>         | -3.97 | -9.8  | 0.002    | 10407173 |
|                  | <i>Iso1</i>          | -2.92 | -16.4 | 5.00E-04 | 10455912 |
|                  | <i>Kpna2</i>         | -2.21 | -9.6  | 0.002    | 10497503 |
|                  | <i>Limk1</i>         | -2.13 | -10.8 | 0.001    | 10534324 |
|                  | <i>Mgpr</i>          | -2.04 | -10   | 0.002    | 10541484 |
|                  | <i>Mastl</i>         | -2.67 | -15.4 | 6.00E-04 | 10480432 |
|                  | <i>Mef2c</i>         | -2.16 | -12.3 | 9.00E-04 | 10406434 |
|                  | <i>Neto2</i>         | -2.84 | -12.1 | 0.001    | 10580382 |
|                  | <i>Npat</i>          | -2.68 | -12.7 | 9.00E-04 | 10585358 |
|                  | <i>Nr2c1</i>         | -2.06 | -14.1 | 7.00E-04 | 10365870 |
|                  | <i>Nup35</i>         | -2.15 | -12.8 | 9.00E-04 | 10567131 |
|                  | <i>Ocr1</i>          | -3.21 | -19.7 | 4.00E-04 | 10599435 |
|                  | <i>Pgm2l1</i>        | -2.73 | -12.2 | 0.001    | 10555303 |
|                  | <i>Phf6</i>          | -2.85 | -13.2 | 8.00E-04 | 10599612 |
|                  | <i>Phf2</i>          | -2.46 | -13.9 | 7.00E-04 | 10528238 |
|                  | <i>Polq</i>          | -2.83 | -16.2 | 5.00E-04 | 10435581 |
|                  | <i>Polr3g</i>        | -2.06 | -9    | 0.002    | 10410877 |
|                  | <i>Ppns1</i>         | -3.3  | -20.9 | 4.00E-04 | 10364518 |
|                  | <i>Ppns4</i>         | -3.07 | -23   | 4.00E-04 | 10357191 |
|                  | <i>Qsox1</i>         | -4.99 | -36.7 | 3.00E-04 | 10485622 |
|                  | <i>Rad23b</i>        | -2.05 | -12.3 | 9.00E-04 | 10505092 |
|                  | <i>Rrm2</i>          | -3.5  | -15.8 | 5.00E-04 | 10394978 |
|                  | <i>Smad5</i>         | -2.46 | -9.7  | 0.002    | 10405605 |
|                  | <i>Snx30</i>         | -2.4  | -11.4 | 0.001    | 10505224 |
|                  | <i>Snx5</i>          | -2.87 | -14.7 | 6.00E-04 | 10488237 |
|                  | <i>Suv39h1</i>       | -3.45 | -19.6 | 4.00E-04 | 10603431 |
|                  | <i>Tcfap4</i>        | -3.2  | -17.2 | 5.00E-04 | 10437384 |
|                  | <i>Trim37</i>        | -3.62 | -23.1 | 3.00E-04 | 10379998 |
|                  | <i>Txlna</i>         | -2.01 | -14.3 | 7.00E-04 | 10516666 |
|                  | <i>Ubf1d</i>         | -2.79 | -16   | 5.00E-04 | 10557139 |
|                  | <i>Wee1</i>          | -5    | -16.4 | 5.00E-04 | 10556266 |
|                  | <i>Zbtb41</i>        | -2.2  | -12   | 0.001    | 10350377 |
|                  | <i>Zc3h7b</i>        | -2.12 | -14.8 | 6.00E-04 | 10425558 |
|                  | <i>Zfp367</i>        | -2.71 | -11.8 | 0.001    | 10410092 |
|                  | <i>Zfp422</i>        | -2.56 | -17.3 | 5.00E-04 | 10443940 |
| mmu-miR-186 (↑)  | <i>270060E02Rik</i>  | -2.07 | -9.7  | 0.002    | 10499425 |
|                  | <i>C80913</i>        | -3.34 | -16.4 | 5.00E-04 | 10562548 |
|                  | <i>Cend2</i>         | -2.71 | -11.6 | 0.001    | 10548105 |
|                  | <i>Chd9</i>          | -2.87 | -16.7 | 5.00E-04 | 10573823 |
|                  | <i>Cirh1a</i>        | -3.99 | -19.1 | 4.00E-04 | 10575102 |
|                  | <i>Dek</i>           | -2.92 | -10.2 | 0.002    | 10409031 |
|                  | <i>Eif4e</i>         | -2.32 | -12.4 | 9.00E-04 | 10496485 |
|                  | <i>Ext1</i>          | -2.16 | -10.9 | 0.001    | 10428579 |
|                  | <i>Fus8</i>          | -3.35 | -21.1 | 4.00E-04 | 10396712 |
|                  | <i>Gria3</i>         | -6.15 | -27.8 | 3.00E-04 | 10599348 |
|                  | <i>Hyou1</i>         | -3.32 | -22.5 | 3.00E-04 | 10584712 |
|                  | <i>Ints2</i>         | -3.55 | -22.6 | 3.00E-04 | 10389421 |
|                  | <i>Mdn1</i>          | -2.77 | -18.6 | 4.00E-04 | 10503723 |
|                  | <i>Nasp</i>          | -3.46 | -19.5 | 4.00E-04 | 10515337 |
|                  | <i>Nsk1</i>          | -2.32 | -13   | 8.00E-04 | 10571922 |
|                  | <i>Nup93</i>         | -4.17 | -19.9 | 4.00E-04 | 10574033 |
|                  | <i>Oncl4</i>         | -2.03 | -14.2 | 7.00E-04 | 10573027 |
|                  | <i>Pds5b</i>         | -2.68 | -14.9 | 6.00E-04 | 10527832 |
|                  | <i>Ran</i>           | -3.55 | -25.7 | 3.00E-04 | 10525983 |
|                  | <i>Snx30</i>         | -2.4  | -11.4 | 0.001    | 10505224 |
|                  | <i>Xpot</i>          | -3.65 | -16.1 | 5.00E-04 | 10372877 |
| mmu-miR-146a (↑) | <i>Depdc6</i>        | -2.72 | -8    | 0.003    | 10424126 |
|                  | <i>Fvns1abp</i>      | -2.98 | -21.6 | 4.00E-04 | 10350594 |
|                  | <i>Psmc3</i>         | -2.21 | -16.2 | 5.00E-04 | 10380986 |
|                  | <i>Sirbp</i>         | -2.39 | -10.8 | 0.001    | 10482181 |
|                  | <i>Taf9b</i>         | -2.05 | -13.4 | 8.00E-04 | 10606315 |
|                  | <i>Tfdp2</i>         | -3.07 | -16   | 5.00E-04 | 10588007 |
|                  | <i>Zfp367</i>        | -2.71 | -11.8 | 0.001    | 10410092 |
| mmu-miR-425 (↑)  | <i>Dek</i>           | -2.92 | -10.2 | 0.002    | 10409031 |

|                    |                      |                      |          |                          |                          |                          |
|--------------------|----------------------|----------------------|----------|--------------------------|--------------------------|--------------------------|
|                    | <i>Hnmpab</i>        | -2.84                | -15      | 6.00E-04                 | <a href="#">10385686</a> |                          |
|                    | <i>Mef2c</i>         | -2.16                | -12.3    | 9.00E-04                 | <a href="#">10406434</a> |                          |
|                    | <i>Rnf219</i>        | -2.41                | -9.6     | 0.002                    | <a href="#">10422185</a> |                          |
|                    | <i>Slc16a1</i>       | -4.21                | -25.4    | 3.00E-04                 | <a href="#">10495035</a> |                          |
|                    | <i>Syncrip</i>       | -2.82                | -16.3    | 5.00E-04                 | <a href="#">10595604</a> |                          |
| mmu-miR-7 (↑)      | <i>0610007P14Rik</i> | -2.57                | -15.3    | 6.00E-04                 | <a href="#">10401667</a> |                          |
|                    | <i>Ahi2</i>          | -2.53                | -15.4    | 6.00E-04                 | <a href="#">10346764</a> |                          |
|                    | <i>Ankrd49</i>       | -2.66                | -16.8    | 5.00E-04                 | <a href="#">10590968</a> |                          |
|                    | <i>Atp2a2</i>        | -3.07                | -14.4    | 7.00E-04                 | <a href="#">10533483</a> |                          |
|                    | <i>Bcap29</i>        | -4.75                | -14.5    | 6.00E-04                 | <a href="#">10399874</a> |                          |
|                    | <i>Bzw2</i>          | -4.67                | -26.8    | 3.00E-04                 | <a href="#">10400030</a> |                          |
|                    | <i>Calu</i>          | -3.7                 | -18.1    | 5.00E-04                 | <a href="#">10536818</a> |                          |
|                    | <i>Cand1</i>         | -2.37                | -16.9    | 5.00E-04                 | <a href="#">10372750</a> |                          |
|                    | <i>Chx5</i>          | -4.33                | -12.9    | 8.00E-04                 | <a href="#">10433088</a> |                          |
|                    | <i>Cend2</i>         | -2.71                | -11.6    | 0.001                    | <a href="#">10548105</a> |                          |
|                    | <i>Cdc25a</i>        | -2.08                | -8.4     | 0.003                    | <a href="#">10589420</a> |                          |
|                    | <i>Cipb</i>          | -2.03                | -13.9    | 7.00E-04                 | <a href="#">10555550</a> |                          |
|                    | <i>Cmn3</i>          | -3.37                | -17.3    | 5.00E-04                 | <a href="#">10406852</a> |                          |
|                    | <i>Crtap</i>         | -3.25                | -23.7    | 3.00E-04                 | <a href="#">10597413</a> |                          |
|                    | <i>Ddost</i>         | -4                   | -24.1    | 3.00E-04                 | <a href="#">10509542</a> |                          |
|                    | <i>Ddx19a</i>        | -2.22                | -10.9    | 0.001                    | <a href="#">10581729</a> |                          |
|                    | <i>Ddx19b</i>        | -2.21                | -10.5    | 0.001                    | <a href="#">10581737</a> |                          |
|                    | <i>E2f6</i>          | -3.47                | -14.7    | 6.00E-04                 | <a href="#">10394690</a> |                          |
|                    | <i>Eif4e</i>         | -2.32                | -12.4    | 9.00E-04                 | <a href="#">10496485</a> |                          |
|                    | <i>Ergic1</i>        | -2.43                | -12.2    | 0.001                    | <a href="#">10443009</a> |                          |
|                    | <i>Ezh2</i>          | -3.13                | -20.5    | 4.00E-04                 | <a href="#">10544501</a> |                          |
|                    | <i>Gatm</i>          | -4.45                | -19.5    | 4.00E-04                 | <a href="#">10487011</a> |                          |
|                    | <i>Gnptab</i>        | -2.02                | -12.5    | 9.00E-04                 | <a href="#">10365601</a> |                          |
|                    | <i>Gol11b</i>        | -3.09                | -21.1    | 4.00E-04                 | <a href="#">10542650</a> |                          |
|                    | <i>Gspt1</i>         | -3.41                | -13.8    | 7.00E-04                 | <a href="#">10437748</a> |                          |
|                    | <i>Gtf2i</i>         | -4.11                | -23.5    | 3.00E-04                 | <a href="#">10534216</a> |                          |
|                    | <i>H47</i>           | -2.29                | -12.1    | 0.001                    | <a href="#">10554005</a> |                          |
|                    | <i>Hmga1</i>         | -2.84                | -14.9    | 6.00E-04                 | <a href="#">10383479</a> |                          |
|                    | <i>Hook1</i>         | -3.12                | -20.9    | 4.00E-04                 | <a href="#">10506004</a> |                          |
|                    | <i>Iars</i>          | -2.17                | -10.7    | 0.001                    | <a href="#">10360884</a> |                          |
|                    | <i>Ide</i>           | -5.16                | -19.1    | 4.00E-04                 | <a href="#">10467240</a> |                          |
|                    | <i>Ikbkap</i>        | -2.64                | -14.1    | 7.00E-04                 | <a href="#">10513020</a> |                          |
|                    | <i>Irf2</i>          | -2.23                | -12      | 0.001                    | <a href="#">10555312</a> |                          |
|                    | <i>Ins2</i>          | -3.55                | -22.6    | 3.00E-04                 | <a href="#">10389421</a> |                          |
|                    | <i>Klhl23</i>        | -2.08                | -13.4    | 8.00E-04                 | <a href="#">10472598</a> |                          |
|                    | <i>Ktce1</i>         | -3.54                | -25.6    | 3.00E-04                 | <a href="#">10439471</a> |                          |
|                    | <i>Letmd1</i>        | -2.05                | -14      | 7.00E-04                 | <a href="#">10426909</a> |                          |
|                    | <i>Lphn2</i>         | -3.25                | -14.7    | 6.00E-04                 | <a href="#">10502780</a> |                          |
|                    | <i>Msi2</i>          | -2.13                | -13      | 8.00E-04                 | <a href="#">10389680</a> |                          |
|                    | <i>Nap11l</i>        | -3.6                 | -13.5    | 8.00E-04                 | <a href="#">10366337</a> |                          |
|                    | <i>Nfix1</i>         | -2.05                | -14.9    | 6.00E-04                 | <a href="#">10530467</a> |                          |
|                    | <i>Nme4</i>          | -2.42                | -7       | 0.005                    | <a href="#">10449236</a> |                          |
|                    | <i>Nr2c1</i>         | -2.06                | -14.1    | 7.00E-04                 | <a href="#">10365870</a> |                          |
|                    | <i>Parp1</i>         | -4.23                | -11.3    | 0.001                    | <a href="#">10552242</a> |                          |
|                    | <i>Pgm21l</i>        | -2.73                | -12.2    | 0.001                    | <a href="#">10555303</a> |                          |
|                    | <i>Phf17</i>         | -2.36                | -16.3    | 5.00E-04                 | <a href="#">10491860</a> |                          |
|                    | <i>Pik3ip1</i>       | -2.02                | -13.1    | 8.00E-04                 | <a href="#">10373740</a> |                          |
|                    | <i>Pole4</i>         | -2.98                | -17.1    | 5.00E-04                 | <a href="#">10545583</a> |                          |
|                    | <i>Ppm1f</i>         | -2.22                | -13.2    | 8.00E-04                 | <a href="#">10433929</a> |                          |
|                    | <i>Rrm2</i>          | -3.5                 | -15.8    | 5.00E-04                 | <a href="#">10394978</a> |                          |
|                    | <i>Scd2</i>          | -4.45                | -16.7    | 5.00E-04                 | <a href="#">10463355</a> |                          |
|                    | <i>Scyl3</i>         | -3.24                | -14.4    | 7.00E-04                 | <a href="#">10359648</a> |                          |
|                    | <i>Skp2</i>          | -2.97                | -21.9    | 4.00E-04                 | <a href="#">10427606</a> |                          |
| <i>Smarcd1</i>     | -3.33                | -15                  | 6.00E-04 | <a href="#">10538755</a> |                          |                          |
| <i>Smarccl</i>     | -3.89                | -25.2                | 3.00E-04 | <a href="#">10589466</a> |                          |                          |
| <i>Smyd5</i>       | -3.2                 | -17.5                | 5.00E-04 | <a href="#">10539592</a> |                          |                          |
| <i>Snc30</i>       | -2.4                 | -11.4                | 0.001    | <a href="#">10505224</a> |                          |                          |
| <i>Snc5</i>        | -2.87                | -14.7                | 6.00E-04 | <a href="#">10488237</a> |                          |                          |
| <i>Spryd4</i>      | -2.62                | -18.4                | 4.00E-04 | <a href="#">10373355</a> |                          |                          |
| <i>Strbp</i>       | -2.39                | -10.8                | 0.001    | <a href="#">10482181</a> |                          |                          |
| <i>Syncrip</i>     | -2.82                | -16.3                | 5.00E-04 | <a href="#">10595604</a> |                          |                          |
| <i>Tap98</i>       | -2.05                | -13.4                | 8.00E-04 | <a href="#">10606315</a> |                          |                          |
| <i>Tcf12</i>       | -3.29                | -18.4                | 4.00E-04 | <a href="#">10594939</a> |                          |                          |
| <i>Tfrc</i>        | -3.33                | -18.9                | 4.00E-04 | <a href="#">10435075</a> |                          |                          |
| <i>Thoc1</i>       | -3.3                 | -16.5                | 5.00E-04 | <a href="#">10453766</a> |                          |                          |
| <i>Till4</i>       | -2.36                | -10.9                | 0.001    | <a href="#">10347460</a> |                          |                          |
| <i>Tslna</i>       | -2.01                | -14.3                | 7.00E-04 | <a href="#">10516666</a> |                          |                          |
| mmu-miR-342-3p (↑) | <i>Ankrd49</i>       | -2.66                | -16.8    | 5.00E-04                 | <a href="#">10590968</a> |                          |
|                    | <i>Chx5</i>          | -4.33                | -12.9    | 8.00E-04                 | <a href="#">10433088</a> |                          |
|                    | <i>Fut8</i>          | -3.35                | -21.1    | 4.00E-04                 | <a href="#">10396712</a> |                          |
|                    | <i>Gspt1</i>         | -3.41                | -13.8    | 7.00E-04                 | <a href="#">10437748</a> |                          |
|                    | <i>Kdsr</i>          | -2.12                | -13      | 8.00E-04                 | <a href="#">10557051</a> |                          |
|                    | <i>Pgm21l</i>        | -2.73                | -12.2    | 0.001                    | <a href="#">10555303</a> |                          |
|                    | <i>Rad23b</i>        | -2.05                | -12.3    | 9.00E-04                 | <a href="#">10505092</a> |                          |
| <i>Tfip2</i>       | -3.07                | -16                  | 5.00E-04 | <a href="#">10588007</a> |                          |                          |
| mmu-miR-148a (↑)   | <i>1310001101Rik</i> | -3.87                | -21.5    | 4.00E-04                 | <a href="#">10378453</a> |                          |
|                    | <i>Arhgap21</i>      | -2.49                | -10      | 0.002                    | <a href="#">10480381</a> |                          |
|                    | <i>Atp2a2</i>        | -3.07                | -14.4    | 7.00E-04                 | <a href="#">10533483</a> |                          |
|                    | <i>Cand1</i>         | -2.37                | -16.9    | 5.00E-04                 | <a href="#">10372750</a> |                          |
|                    | <i>Cmxr</i>          | -2.83                | -12.9    | 8.00E-04                 | <a href="#">10385599</a> |                          |
|                    | <i>Cnfr</i>          | -2.88                | -9.2     | 0.002                    | <a href="#">10445306</a> |                          |
|                    | <i>Chchd4</i>        | -2.35                | -13.3    | 8.00E-04                 | <a href="#">10546346</a> |                          |
|                    | <i>Chd9</i>          | -2.87                | -16.7    | 5.00E-04                 | <a href="#">10573823</a> |                          |
|                    | <i>Cul5</i>          | -2.11                | -14.6    | 6.00E-04                 | <a href="#">10593605</a> |                          |
|                    | <i>Dger8</i>         | -2.31                | -14.4    | 7.00E-04                 | <a href="#">10438313</a> |                          |
|                    | <i>Dnmt1</i>         | -2.91                | -13.8    | 7.00E-04                 | <a href="#">10591369</a> |                          |
|                    | <i>Dynl12</i>        | -2.07                | -8.1     | 0.003                    | <a href="#">10389674</a> |                          |
|                    | <i>Fubp1</i>         | -2.95                | -19.6    | 4.00E-04                 | <a href="#">10496892</a> |                          |
|                    | <i>Gnpat1</i>        | -3.55                | -16.5    | 5.00E-04                 | <a href="#">10419216</a> |                          |
|                    | <i>Hbst</i>          | -3.97                | -9.8     | 0.002                    | <a href="#">10407173</a> |                          |
|                    | <i>Met</i>           | -4.45                | -13.7    | 7.00E-04                 | <a href="#">10536505</a> |                          |
|                    | <i>Msi2</i>          | -2.13                | -13      | 8.00E-04                 | <a href="#">10389680</a> |                          |
|                    | <i>Onu4</i>          | -2.03                | -14.2    | 7.00E-04                 | <a href="#">10573027</a> |                          |
|                    | <i>Pdia3</i>         | -2.15                | -11.6    | 0.001                    | <a href="#">10475335</a> |                          |
|                    | <i>Pgm21l</i>        | -2.73                | -12.2    | 0.001                    | <a href="#">10555303</a> |                          |
|                    | <i>Sgcb</i>          | -2.38                | -10.1    | 0.002                    | <a href="#">10530633</a> |                          |
|                    | <i>Sns</i>           | -4.2                 | -23.4    | 3.00E-04                 | <a href="#">10607524</a> |                          |
|                    | <i>Syncrip</i>       | -2.82                | -16.3    | 5.00E-04                 | <a href="#">10595604</a> |                          |
|                    | <i>Tfrc</i>          | -3.33                | -18.9    | 4.00E-04                 | <a href="#">10435075</a> |                          |
|                    | <i>Tom70a</i>        | -2.42                | -13.7    | 7.00E-04                 | <a href="#">10436348</a> |                          |
|                    | <i>Whsc1</i>         | -2.55                | -18.6    | 4.00E-04                 | <a href="#">10521136</a> |                          |
|                    | mmu-let-7g (↑)       | <i>0610007P14Rik</i> | -2.57    | -15.3                    | 6.00E-04                 | <a href="#">10401667</a> |
|                    |                      | <i>Ahi2</i>          | -2.53    | -15.4                    | 6.00E-04                 | <a href="#">10346764</a> |
|                    |                      | <i>Ankrd49</i>       | -2.66    | -16.8                    | 5.00E-04                 | <a href="#">10590968</a> |
|                    |                      | <i>Atp2a2</i>        | -3.07    | -14.4                    | 7.00E-04                 | <a href="#">10533483</a> |
|                    |                      | <i>Bcap29</i>        | -4.75    | -14.5                    | 6.00E-04                 | <a href="#">10399874</a> |
| <i>Bzw2</i>        |                      | -4.67                | -26.8    | 3.00E-04                 | <a href="#">10400030</a> |                          |
| <i>Calu</i>        |                      | -3.7                 | -18.1    | 5.00E-04                 | <a href="#">10536818</a> |                          |
| <i>Cand1</i>       |                      | -2.37                | -16.9    | 5.00E-04                 | <a href="#">10372750</a> |                          |
| <i>Chx5</i>        |                      | -4.33                | -12.9    | 8.00E-04                 | <a href="#">10433088</a> |                          |
| <i>Cend2</i>       |                      | -2.71                | -11.6    | 0.001                    | <a href="#">10548105</a> |                          |
| <i>Cmn3</i>        |                      | -3.37                | -17.3    | 5.00E-04                 | <a href="#">10406852</a> |                          |
| <i>Crtap</i>       |                      | -3.25                | -23.7    | 3.00E-04                 | <a href="#">10597413</a> |                          |
| <i>Ddost</i>       |                      | -4                   | -24.1    | 3.00E-04                 | <a href="#">10509542</a> |                          |
| <i>Ddx19a</i>      |                      | -2.22                | -10.9    | 0.001                    | <a href="#">10581729</a> |                          |
| <i>Ddx19b</i>      |                      | -2.21                | -10.5    | 0.001                    | <a href="#">10581737</a> |                          |
| <i>E2f6</i>        |                      | -3.47                | -14.7    | 6.00E-04                 | <a href="#">10394690</a> |                          |
| <i>Eif4e</i>       |                      | -2.32                | -12.4    | 9.00E-04                 | <a href="#">10496485</a> |                          |
| <i>Ergic1</i>      |                      | -2.43                | -12.2    | 0.001                    | <a href="#">10443009</a> |                          |
| <i>Ezh2</i>        |                      | -3.13                | -20.5    | 4.00E-04                 | <a href="#">10544501</a> |                          |
| <i>Gatm</i>        |                      | -4.45                | -19.5    | 4.00E-04                 | <a href="#">10487011</a> |                          |
| <i>Gnptab</i>      |                      | -2.02                | -12.5    | 9.00E-04                 | <a href="#">10365601</a> |                          |
| <i>Gol11b</i>      |                      | -3.09                | -21.1    | 4.00E-04                 | <a href="#">10542650</a> |                          |
| <i>Gspt1</i>       |                      | -3.41                | -13.8    | 7.00E-04                 | <a href="#">10437748</a> |                          |
| <i>Gtf2i</i>       |                      | -4.11                | -23.5    | 3.00E-04                 | <a href="#">10534216</a> |                          |

|                  |                      |       |       |          |          |
|------------------|----------------------|-------|-------|----------|----------|
|                  | <i>H47</i>           | -2.29 | -12.1 | 0.001    | 10554005 |
|                  | <i>Hmga1</i>         | -2.84 | -14.9 | 6.00E-04 | 10383479 |
|                  | <i>Hook1</i>         | -3.12 | -20.9 | 4.00E-04 | 10506004 |
|                  | <i>Iars</i>          | -2.17 | -10.7 | 0.001    | 10360884 |
|                  | <i>Ide</i>           | -5.16 | -19.1 | 4.00E-04 | 10467250 |
|                  | <i>Ikkap</i>         | -2.64 | -14.1 | 7.00E-04 | 10513020 |
|                  | <i>Ikp2</i>          | -2.23 | -12   | 0.001    | 10355312 |
|                  | <i>Ins2</i>          | -3.55 | -22.6 | 3.00E-04 | 10389431 |
|                  | <i>Ktcl1</i>         | -3.54 | -25.6 | 3.00E-04 | 10439471 |
|                  | <i>Lphn2</i>         | -3.25 | -14.7 | 6.00E-04 | 10502780 |
|                  | <i>Nap1l1</i>        | -3.6  | -13.5 | 8.00E-04 | 10366337 |
|                  | <i>Nme4</i>          | -2.42 | -7    | 0.005    | 10449236 |
|                  | <i>Parp1</i>         | -4.23 | -11.3 | 0.001    | 10352242 |
|                  | <i>Pgm2l1</i>        | -2.73 | -12.2 | 0.001    | 10555303 |
|                  | <i>Phf17</i>         | -2.36 | -16.3 | 5.00E-04 | 10491860 |
|                  | <i>Pik3ip1</i>       | -2.02 | -13.1 | 8.00E-04 | 10373740 |
|                  | <i>Pole4</i>         | -2.98 | -17.1 | 5.00E-04 | 10545583 |
|                  | <i>Rrm2</i>          | -3.5  | -15.8 | 5.00E-04 | 10394978 |
|                  | <i>Scd2</i>          | -4.45 | -16.7 | 5.00E-04 | 10463355 |
|                  | <i>Scyl3</i>         | -3.24 | -14.4 | 7.00E-04 | 10359648 |
|                  | <i>Sbp2</i>          | -2.97 | -21.9 | 4.00E-04 | 10427606 |
|                  | <i>Smacral1</i>      | -3.33 | -15   | 6.00E-04 | 10383755 |
|                  | <i>Smorc1</i>        | -3.89 | -25.2 | 3.00E-04 | 10589466 |
|                  | <i>Smyd3</i>         | -3.2  | -17.5 | 5.00E-04 | 10539592 |
|                  | <i>Snc30</i>         | -2.4  | -11.4 | 0.001    | 10505224 |
|                  | <i>Snc5</i>          | -2.87 | -14.7 | 6.00E-04 | 10488237 |
|                  | <i>Spryd4</i>        | -2.62 | -18.4 | 4.00E-04 | 10373355 |
|                  | <i>Strbp</i>         | -2.39 | -10.8 | 0.001    | 10482181 |
|                  | <i>Syncrp</i>        | -2.82 | -16.3 | 5.00E-04 | 10595604 |
|                  | <i>Tcf12</i>         | -3.29 | -18.4 | 4.00E-04 | 10594879 |
|                  | <i>Tfrc</i>          | -3.33 | -18.9 | 4.00E-04 | 10435075 |
|                  | <i>Thoc1</i>         | -3.3  | -16.5 | 5.00E-04 | 10453766 |
|                  | <i>Tmed9</i>         | -1.99 | -6.8  | 0.006    | 10405488 |
|                  | <i>Till4</i>         | -2.36 | -10.9 | 0.001    | 10347460 |
|                  | <i>Zfp362</i>        | -1.68 | -7    | 0.005    | 10516520 |
| mmu-miR-149 (↑)  | <i>1300001101Rik</i> | -3.87 | -21.5 | 4.00E-04 | 10378453 |
|                  | <i>493057205Rik</i>  | -2.12 | -9    | 0.002    | 10424667 |
|                  | <i>Ahrap21</i>       | -2.49 | -10   | 0.002    | 10480381 |
|                  | <i>Atp2a2</i>        | -3.07 | -14.4 | 7.00E-04 | 10533483 |
|                  | <i>Cln6</i>          | -3.12 | -22.6 | 3.00E-04 | 10586110 |
|                  | <i>Ext1</i>          | -2.16 | -10.9 | 0.001    | 10428579 |
|                  | <i>Gfi1</i>          | -2.03 | -14.9 | 6.00E-04 | 10532124 |
|                  | <i>Gria3</i>         | -6.15 | -27.8 | 3.00E-04 | 10599348 |
|                  | <i>Hnrnpa1</i>       | -1.87 | -8.4  | 0.003    | 10427885 |
|                  | <i>Ilf3</i>          | -3.23 | -23.8 | 3.00E-04 | 10583610 |
|                  | <i>Ipo9</i>          | -2.5  | -13.2 | 8.00E-04 | 10358064 |
|                  | <i>Nucks1</i>        | -3.98 | -15.1 | 6.00E-04 | 10349733 |
|                  | <i>Prps2</i>         | -4.18 | -25.4 | 3.00E-04 | 10607877 |
|                  | <i>Ubf1d</i>         | -2.79 | -16   | 5.00E-04 | 10557139 |
|                  | <i>Wrb</i>           | -2.69 | -16.2 | 5.00E-04 | 10437174 |
|                  | <i>Zfp704</i>        | -1.89 | -13   | 8.00E-04 | 10497222 |
| mmu-miR-22 (↑)   | <i>Akt3</i>          | -2.59 | -15   | 6.00E-04 | 10360506 |
|                  | <i>Cand1</i>         | -2.37 | -16.9 | 5.00E-04 | 10372750 |
|                  | <i>Cdk6</i>          | -3.33 | -20.9 | 4.00E-04 | 10381072 |
|                  | <i>Cit69</i>         | -2.87 | -16.7 | 5.00E-04 | 10573823 |
|                  | <i>Elovl6</i>        | -3    | -11.1 | 0.001    | 10495993 |
|                  | <i>Gatm</i>          | -4.45 | -19.5 | 4.00E-04 | 10487011 |
|                  | <i>Lgals1</i>        | -4.48 | -15   | 6.00E-04 | 10425161 |
|                  | <i>Mat2a</i>         | -3.23 | -17.4 | 5.00E-04 | 10545417 |
|                  | <i>Mjf2</i>          | -2.19 | -12.6 | 9.00E-04 | 10523905 |
|                  | <i>Ola1</i>          | -2.82 | -14.5 | 6.00E-04 | 10483648 |
|                  | <i>Pdss1</i>         | -2.3  | -16.6 | 5.00E-04 | 10469712 |
|                  | <i>Sephs1</i>        | -2.67 | -13.5 | 8.00E-04 | 10469035 |
|                  | <i>Snc30</i>         | -2.4  | -11.4 | 0.001    | 10505224 |
|                  | <i>Yars</i>          | -2.81 | -14   | 7.00E-04 | 10508420 |
|                  | <i>Zfp706</i>        | -2.24 | -13.1 | 8.00E-04 | 10428211 |
| mmu-miR-25 (↑)   | <i>4933439F18Rik</i> | -3.33 | -20.2 | 4.00E-04 | 10376596 |
|                  | <i>Aars</i>          | -2.48 | -12.6 | 9.00E-04 | 10575550 |
|                  | <i>Atp2a2</i>        | -3.07 | -14.4 | 7.00E-04 | 10533483 |
|                  | <i>Cand1</i>         | -2.37 | -16.9 | 5.00E-04 | 10372750 |
|                  | <i>Cit69</i>         | -2.82 | -9.6  | 0.002    | 10548333 |
|                  | <i>Cdca7l</i>        | -4.02 | -15.2 | 6.00E-04 | 10399178 |
|                  | <i>Chd9</i>          | -2.87 | -16.7 | 5.00E-04 | 10573823 |
|                  | <i>Dbt</i>           | -2.29 | -15.4 | 6.00E-04 | 10495549 |
|                  | <i>Fubp1</i>         | -2.95 | -19.6 | 4.00E-04 | 10496892 |
|                  | <i>Gata2</i>         | -2.63 | -12.4 | 9.00E-04 | 10539873 |
|                  | <i>Gria3</i>         | -6.15 | -27.8 | 3.00E-04 | 10599348 |
|                  | <i>Ikp2</i>          | -2.23 | -12   | 0.001    | 10355312 |
|                  | <i>Itp1</i>          | -3.21 | -19.8 | 4.00E-04 | 10540408 |
|                  | <i>Nsmaf</i>         | -3.59 | -14.3 | 7.00E-04 | 10511382 |
|                  | <i>Phf17</i>         | -2.36 | -16.3 | 5.00E-04 | 10491860 |
|                  | <i>Pre1</i>          | -2.86 | -13   | 8.00E-04 | 10554445 |
|                  | <i>Qser1</i>         | -4.99 | -36.7 | 3.00E-04 | 10485622 |
|                  | <i>Rpl15</i>         | -3.09 | -11.1 | 0.001    | 10547638 |
|                  | <i>Sfn1</i>          | -4.18 | -26.3 | 3.00E-04 | 10405236 |
|                  | <i>Snc30</i>         | -2.4  | -11.4 | 0.001    | 10505224 |
|                  | <i>Spryd4</i>        | -2.62 | -18.4 | 4.00E-04 | 10373355 |
|                  | <i>Ssbp2</i>         | -2.2  | -8.1  | 0.003    | 10406551 |
|                  | <i>Tgfl1</i>         | -2.16 | -16   | 5.00E-04 | 10452633 |
| mmu-miR-322* (↑) | <i>4933439F18Rik</i> | -3.33 | -20.2 | 4.00E-04 | 10376596 |
|                  | <i>Aars</i>          | -2.48 | -12.6 | 9.00E-04 | 10575550 |
|                  | <i>Atp2a2</i>        | -3.07 | -14.4 | 7.00E-04 | 10533483 |
|                  | <i>Cand1</i>         | -2.37 | -16.9 | 5.00E-04 | 10372750 |
|                  | <i>Cit69</i>         | -2.82 | -9.6  | 0.002    | 10548333 |
|                  | <i>Cdca7l</i>        | -4.02 | -15.2 | 6.00E-04 | 10399178 |
|                  | <i>Chd9</i>          | -2.87 | -16.7 | 5.00E-04 | 10573823 |
|                  | <i>Dbt</i>           | -2.29 | -15.4 | 6.00E-04 | 10495549 |
|                  | <i>Fubp1</i>         | -2.95 | -19.6 | 4.00E-04 | 10496892 |
|                  | <i>Gata2</i>         | -2.63 | -12.4 | 9.00E-04 | 10539873 |
|                  | <i>Gria3</i>         | -6.15 | -27.8 | 3.00E-04 | 10599348 |
|                  | <i>Ikp2</i>          | -2.23 | -12   | 0.001    | 10355312 |
|                  | <i>Itp1</i>          | -3.21 | -19.8 | 4.00E-04 | 10540408 |
|                  | <i>Nsmaf</i>         | -3.59 | -14.3 | 7.00E-04 | 10511382 |
|                  | <i>Phf17</i>         | -2.36 | -16.3 | 5.00E-04 | 10491860 |
|                  | <i>Pre1</i>          | -2.86 | -13   | 8.00E-04 | 10554445 |
|                  | <i>Qser1</i>         | -4.99 | -36.7 | 3.00E-04 | 10485622 |
|                  | <i>Rpl15</i>         | -3.09 | -11.1 | 0.001    | 10547638 |
|                  | <i>Sfn1</i>          | -4.18 | -26.3 | 3.00E-04 | 10405236 |
|                  | <i>Snc30</i>         | -2.4  | -11.4 | 0.001    | 10505224 |
|                  | <i>Spryd4</i>        | -2.62 | -18.4 | 4.00E-04 | 10373355 |
|                  | <i>Ssbp2</i>         | -2.2  | -8.1  | 0.003    | 10406551 |
|                  | <i>Tgfl1</i>         | -2.16 | -16   | 5.00E-04 | 10452633 |
| mmu-miR-33* (↑)  | <i>Cand1</i>         | -2.37 | -16.9 | 5.00E-04 | 10372750 |
|                  | <i>Cdk6</i>          | -4.23 | -20.9 | 3.00E-04 | 10519254 |
|                  | <i>Ctmd1</i>         | -3.11 | -16   | 5.00E-04 | 10484402 |
|                  | <i>Eif2s2</i>        | -2.06 | -10.9 | 0.001    | 10488806 |
|                  | <i>Gria3</i>         | -6.15 | -27.8 | 3.00E-04 | 10599348 |
|                  | <i>Mrs23</i>         | -2.3  | -14.7 | 6.00E-04 | 10546386 |
|                  | <i>Npat</i>          | -2.68 | -12.7 | 9.00E-04 | 10585358 |
|                  | <i>Nuf2</i>          | -3.78 | -18.5 | 4.00E-04 | 10468531 |
|                  | <i>Strbp</i>         | -2.39 | -10.8 | 0.001    | 10482181 |
|                  | <i>Tfp2</i>          | -3.07 | -16   | 5.00E-04 | 10588007 |
| mmu-miR-93 (↑)   | <i>4933439F18Rik</i> | -3.33 | -20.2 | 4.00E-04 | 10376596 |
|                  | <i>Akt3</i>          | -2.59 | -15   | 6.00E-04 | 10360506 |
|                  | <i>Atad2</i>         | -3.16 | -17   | 5.00E-04 | 10428763 |
|                  | <i>C80913</i>        | -3.34 | -16.4 | 5.00E-04 | 10562548 |
|                  | <i>Cand1</i>         | -2.37 | -16.9 | 5.00E-04 | 10372750 |
|                  | <i>Ccdc50</i>        | -2.76 | -11.1 | 0.001    | 10434869 |
|                  | <i>Cend2</i>         | -2.71 | -11.6 | 0.001    | 10548105 |
|                  | <i>Cit69</i>         | -2.82 | -9.6  | 0.002    | 10548333 |



|                  |                      |       |       |          |          |
|------------------|----------------------|-------|-------|----------|----------|
|                  | <i>Cap97</i>         | -3.23 | -11.4 | 0.001    | 10439960 |
|                  | <i>Chd9</i>          | -2.87 | -16.7 | 5.00E-04 | 10573853 |
|                  | <i>Dusp2</i>         | -2.1  | -11.7 | 0.001    | 10475782 |
|                  | <i>Elovl6</i>        | -3    | -11.1 | 0.001    | 10495993 |
|                  | <i>Epha7</i>         | -2.82 | -13.3 | 8.00E-04 | 10503659 |
|                  | <i>Fbxo21</i>        | -2.23 | -13.4 | 8.00E-04 | 10524941 |
|                  | <i>Hmgb3</i>         | -2.34 | -10.3 | 0.002    | 10609017 |
|                  | <i>Hk2ml</i>         | -2.48 | -7.5  | 0.004    | 10502532 |
|                  | <i>Irfat</i>         | -3.97 | -9.8  | 0.002    | 10407173 |
|                  | <i>Isoe1</i>         | -2.92 | -16.4 | 5.00E-04 | 10455912 |
|                  | <i>Kpna2</i>         | -2.21 | -9.6  | 0.002    | 10497503 |
|                  | <i>Masil</i>         | -2.67 | -15.4 | 6.00E-04 | 10480432 |
|                  | <i>Neto2</i>         | -2.84 | -12.1 | 0.001    | 10580382 |
|                  | <i>Npat</i>          | -2.68 | -12.7 | 9.00E-04 | 10585358 |
|                  | <i>Nup35</i>         | -2.15 | -12.8 | 9.00E-04 | 10567131 |
|                  | <i>Ocr1</i>          | -3.21 | -19.7 | 4.00E-04 | 10599435 |
|                  | <i>Pgm21l</i>        | -2.73 | -12.2 | 0.001    | 10555303 |
|                  | <i>Phf6</i>          | -2.85 | -13.2 | 8.00E-04 | 10599612 |
|                  | <i>Polq</i>          | -2.83 | -16.2 | 5.00E-04 | 10435581 |
|                  | <i>Ptbp1</i>         | -3.3  | -20.9 | 4.00E-04 | 10364518 |
|                  | <i>Pppn4</i>         | -3.07 | -22   | 4.00E-04 | 10357151 |
|                  | <i>Rim2</i>          | -3.5  | -15.8 | 5.00E-04 | 10394978 |
|                  | <i>Smod5</i>         | -2.46 | -9.7  | 0.002    | 10405605 |
|                  | <i>Tram37</i>        | -3.62 | -23.1 | 3.00E-04 | 10379998 |
|                  | <i>Ubf1</i>          | -2.79 | -16   | 5.00E-04 | 10557139 |
|                  | <i>Wee1</i>          | -5    | -16.4 | 5.00E-04 | 10556266 |
|                  | <i>Zc3h7b</i>        | -2.12 | -14.8 | 6.00E-04 | 10425578 |
|                  | <i>Zfp362</i>        | -1.68 | -7    | 0.005    | 10516520 |
|                  | <i>Zfp367</i>        | -2.71 | -11.8 | 0.001    | 10410092 |
|                  | <i>Zfp704</i>        | -1.89 | -13   | 8.00E-04 | 10497222 |
| mmu-miR-101a (↓) | <i>A930001N09Rik</i> | 2.99  | 21    | 4.00E-04 | 10443027 |
| mmu-miR-101b (↓) | <i>Abtb2</i>         | 4.12  | 26.7  | 3.00E-04 | 10474181 |
|                  | <i>Arhgef3</i>       | 2.39  | 15.2  | 6.00E-04 | 10413419 |
|                  | <i>Baz2b</i>         | 2.08  | 14.3  | 7.00E-04 | 10482880 |
|                  | <i>BC017647</i>      | 2.12  | 14.9  | 6.00E-04 | 10379030 |
|                  | <i>Dusp1</i>         | 3     | 13.7  | 7.00E-04 | 10449284 |
|                  | <i>Ets1</i>          | 2.82  | 7.6   | 0.004    | 10584142 |
|                  | <i>Fos</i>           | 2.8   | 14.8  | 6.00E-04 | 10397346 |
|                  | <i>Fosl2</i>         | 2.97  | 17.1  | 5.00E-04 | 10520862 |
|                  | <i>Inga8</i>         | 2.59  | 16.7  | 5.00E-04 | 10480090 |
|                  | <i>Jhdm1d</i>        | 4.02  | 24.9  | 3.00E-04 | 10544148 |
|                  | <i>Klf6</i>          | 2.95  | 14.6  | 6.00E-04 | 10403352 |
|                  | <i>Lmtk2</i>         | 2.76  | 17.3  | 5.00E-04 | 10527306 |
|                  | <i>Map3k8</i>        | 2.48  | 10.4  | 0.001    | 10457225 |
|                  | <i>Mxd1</i>          | 4.86  | 35.7  | 3.00E-04 | 10545921 |
|                  | <i>Phf20l1</i>       | 1.83  | 10.9  | 0.001    | 10424485 |
|                  | <i>Phd1a1</i>        | 3.07  | 9.9   | 0.002    | 10366346 |
|                  | <i>Pigs2</i>         | 5.38  | 35    | 3.00E-04 | 10350516 |
|                  | <i>Pipr1</i>         | 2.4   | 14.9  | 6.00E-04 | 10484894 |
|                  | <i>Purx</i>          | 2.96  | 17.4  | 5.00E-04 | 10571241 |
|                  | <i>Rin2</i>          | 4.31  | 12    | 0.001    | 10476759 |
|                  | <i>Sgk1</i>          | 2.66  | 13.6  | 7.00E-04 | 10362073 |
|                  | <i>Trb1</i>          | 3.39  | 23    | 3.00E-04 | 10424330 |
|                  | <i>Tps33np1</i>      | 5     | 25.8  | 3.00E-04 | 10503259 |
|                  | <i>Tps33np2</i>      | 3.69  | 18.9  | 4.00E-04 | 10472644 |
|                  | <i>Zfp3</i>          | 2.51  | 15.4  | 6.00E-04 | 10443589 |
|                  | <i>Zfp33</i>         | 2.49  | 14.1  | 7.00E-04 | 10575213 |
| mmu-miR-155 (↓)  | <i>Arh2</i>          | 3.18  | 13.8  | 7.00E-04 | 10377804 |
|                  | <i>Carhsp1</i>       | 4.3   | 20.8  | 4.00E-04 | 10437590 |
|                  | <i>Cyb561d1</i>      | 1.86  | 12.2  | 9.00E-04 | 10501282 |
|                  | <i>E2f2</i>          | 2.51  | 11.7  | 0.001    | 10509168 |
|                  | <i>Eif2</i>          | 2.58  | 17    | 5.00E-04 | 10406254 |
|                  | <i>Ets1</i>          | 2.82  | 7.6   | 0.004    | 10584142 |
|                  | <i>Fosl2</i>         | 2.97  | 17.1  | 5.00E-04 | 10520862 |
|                  | <i>Jhdm1d</i>        | 4.02  | 24.9  | 3.00E-04 | 10544148 |
|                  | <i>Myo1d</i>         | 4.62  | 15.7  | 6.00E-04 | 10389025 |
|                  | <i>Nfat5</i>         | 2     | 12.3  | 9.00E-04 | 10575160 |
|                  | <i>Plekha1</i>       | 2     | 11.5  | 0.001    | 10391918 |
|                  | <i>Rnf149</i>        | 2.62  | 16.5  | 5.00E-04 | 10354191 |
|                  | <i>Tps33np1</i>      | 5     | 25.8  | 3.00E-04 | 10503259 |
| mmu-miR-196b (↓) | <i>Ccl</i>           | 2.67  | 18.2  | 4.00E-04 | 10388591 |
|                  | <i>Lin28</i>         | 3.22  | 13.8  | 7.00E-04 | 10508907 |
|                  | <i>Pbx1</i>          | 3.4   | 10.8  | 0.001    | 10359870 |
|                  | <i>Rab11fp1</i>      | 3.49  | 24.6  | 3.00E-04 | 10577954 |
|                  | <i>Rassf3</i>        | 2.67  | 16.9  | 5.00E-04 | 10372844 |
| mmu-miR-20a (↓)  | <i>A933426M11Rik</i> | 2.05  | 12.1  | 0.001    | 10396919 |
| mmu-miR-20a* (↓) | <i>Abhd5</i>         | 2.27  | 11.7  | 0.001    | 10590452 |
| mmu-miR-20b (↓)  | <i>Arhgef3</i>       | 2.39  | 15.2  | 6.00E-04 | 10413419 |
|                  | <i>Arg7</i>          | 2.48  | 15.4  | 6.00E-04 | 10540860 |
|                  | <i>E2f2</i>          | 2.51  | 11.7  | 0.001    | 10509168 |
|                  | <i>Fcho2</i>         | 2.75  | 15.5  | 6.00E-04 | 10411464 |
|                  | <i>Fgd4</i>          | 2.47  | 11.7  | 0.001    | 10438017 |
|                  | <i>Foxj2</i>         | 2.07  | 11.4  | 0.001    | 10541532 |
|                  | <i>Furin</i>         | 2.05  | 12.3  | 9.00E-04 | 10564960 |
|                  | <i>Gpr137b</i>       | 3.94  | 17.5  | 5.00E-04 | 10407803 |
|                  | <i>Hes2</i>          | 2.41  | 6.3   | 0.007    | 10428707 |
|                  | <i>Linaf</i>         | 3     | 12.8  | 8.00E-04 | 10437657 |
|                  | <i>Map3k5</i>        | 2.06  | 11.7  | 0.001    | 10361926 |
|                  | <i>Map3k8</i>        | 2.48  | 10.4  | 0.001    | 10457225 |
|                  | <i>Mcl1</i>          | 2.1   | 15.3  | 6.00E-04 | 10494306 |
|                  | <i>Mgll</i>          | 4.66  | 29.7  | 3.00E-04 | 10539894 |
|                  | <i>Myo1d</i>         | 4.62  | 15.7  | 6.00E-04 | 10389025 |
|                  | <i>Nfat5</i>         | 2     | 12.3  | 9.00E-04 | 10575160 |
|                  | <i>Obfc2a</i>        | 3.95  | 27.5  | 3.00E-04 | 10354418 |
|                  | <i>Osm</i>           | 4.33  | 23.8  | 3.00E-04 | 10373912 |
|                  | <i>Phf1</i>          | 3.27  | 17    | 5.00E-04 | 10443063 |
|                  | <i>Plekha1</i>       | 2     | 11.5  | 0.001    | 10391918 |
|                  | <i>Plekho2</i>       | 2.43  | 16.8  | 5.00E-04 | 10594540 |
|                  | <i>Ppp1r3b</i>       | 2.19  | 12.9  | 8.00E-04 | 10571321 |
|                  | <i>Pten</i>          | 1.73  | 12.4  | 9.00E-04 | 10462521 |
|                  | <i>Pipr1</i>         | 2.4   | 14.9  | 6.00E-04 | 10484894 |
|                  | <i>Rab11fp1</i>      | 3.49  | 24.6  | 3.00E-04 | 10577954 |
|                  | <i>Rab11fp4</i>      | 2.53  | 16.9  | 5.00E-04 | 10379321 |
|                  | <i>Rab5b</i>         | 1.75  | 12.3  | 9.00E-04 | 10486057 |
|                  | <i>Rasa2</i>         | 2.18  | 13.5  | 8.00E-04 | 10595805 |
|                  | <i>Reep3</i>         | 2.4   | 12.2  | 0.001    | 10369761 |
|                  | <i>Rel1</i>          | 2.39  | 17.1  | 5.00E-04 | 10530130 |
|                  | <i>Rhoc</i>          | 3.5   | 22.9  | 3.00E-04 | 10495054 |
|                  | <i>Rnf13</i>         | 2.25  | 16.1  | 5.00E-04 | 10492180 |
|                  | <i>Rrugl</i>         | 2.14  | 11.2  | 0.001    | 10503835 |
|                  | <i>Sema7a</i>        | 3.47  | 14.4  | 7.00E-04 | 10585778 |
|                  | <i>Sh3bp5</i>        | 3.38  | 16.4  | 5.00E-04 | 10418702 |
|                  | <i>Skil</i>          | 2.64  | 16.5  | 5.00E-04 | 10491300 |
|                  | <i>Slc40a1</i>       | 4.02  | 27.2  | 3.00E-04 | 10354374 |
|                  | <i>Snrk</i>          | 2.81  | 15.7  | 6.00E-04 | 10590445 |
|                  | <i>Snhb2</i>         | 2.11  | 14.7  | 6.00E-04 | 10572120 |
|                  | <i>SnaH</i>          | 3.44  | 18.2  | 4.00E-04 | 10592333 |
|                  | <i>Slk38</i>         | 2.39  | 15.9  | 5.00E-04 | 10449527 |
|                  | <i>Timp2</i>         | 4.87  | 20.1  | 4.00E-04 | 10393559 |
|                  | <i>Tps33np1</i>      | 5     | 25.8  | 3.00E-04 | 10503259 |
|                  | <i>Tsnp</i>          | 2.34  | 15    | 6.00E-04 | 10494428 |
|                  | <i>Usp32</i>         | 3.47  | 24.3  | 3.00E-04 | 10389339 |
|                  | <i>Usp46</i>         | 1.92  | 13    | 8.00E-04 | 10530641 |
|                  | <i>Vasp</i>          | 2.89  | 19.2  | 4.00E-04 | 10560459 |
|                  | <i>Zfx2</i>          | 2.6   | 15.6  | 6.00E-04 | 10424213 |
| mmu-miR-320 (↓)  | <i>A933426M11Rik</i> | 2.05  | 12.1  | 0.001    | 10396919 |
|                  | <i>Aim1</i>          | 3.58  | 12    | 0.001    | 10368947 |
|                  | <i>Arpc5</i>         | 1.95  | 13.7  | 7.00E-04 | 10350684 |
|                  | <i>Atp11a</i>        | 2.4   | 14.5  | 6.00E-04 | 10570201 |
|                  | <i>Bmpr1a</i>        | 4.81  | 23    | 3.00E-04 | 10418927 |

|                 |                 |      |      |          |                          |
|-----------------|-----------------|------|------|----------|--------------------------|
|                 | <i>Big2</i>     | 3.3  | 23.9 | 3.00E-04 | <a href="#">10357875</a> |
|                 | <i>Cpd</i>      | 2.67 | 18.2 | 4.00E-04 | <a href="#">10388591</a> |
|                 | <i>Ell2</i>     | 2.58 | 17   | 5.00E-04 | <a href="#">10406254</a> |
|                 | <i>Emiln2</i>   | 2.19 | 9.2  | 0.002    | <a href="#">10452648</a> |
|                 | <i>Ets2</i>     | 2.95 | 14   | 7.00E-04 | <a href="#">10437160</a> |
|                 | <i>Jhm1d</i>    | 4.02 | 24.9 | 3.00E-04 | <a href="#">10544148</a> |
|                 | <i>Pbx1</i>     | 3.4  | 10.8 | 0.001    | <a href="#">10359870</a> |
|                 | <i>Pbln1</i>    | 3.57 | 23.7 | 3.00E-04 | <a href="#">10602865</a> |
|                 | <i>Plf1</i>     | 3.27 | 17   | 5.00E-04 | <a href="#">10443063</a> |
|                 | <i>Plk3</i>     | 4.95 | 34.7 | 3.00E-04 | <a href="#">10515399</a> |
|                 | <i>Ppp1r3b</i>  | 2.19 | 12.9 | 8.00E-04 | <a href="#">10571321</a> |
|                 | <i>Pten</i>     | 1.73 | 12.4 | 9.00E-04 | <a href="#">10462521</a> |
|                 | <i>Slec6a6</i>  | 2.18 | 13.4 | 8.00E-04 | <a href="#">10540132</a> |
|                 | <i>Smnp2</i>    | 2.23 | 16.5 | 5.00E-04 | <a href="#">10515994</a> |
|                 | <i>Zfp516</i>   | 2.4  | 13.1 | 8.00E-04 | <a href="#">10457040</a> |
| mmu-miR-378 (↓) | <i>Irf1</i>     | 4.9  | 34.3 | 3.00E-04 | <a href="#">10416847</a> |
|                 | <i>Kbtbd7</i>   | 2.85 | 13.6 | 7.00E-04 | <a href="#">10416653</a> |
| mmu-miR-494 (↓) | <i>Arhgef12</i> | 2.66 | 10.1 | 0.002    | <a href="#">10582862</a> |
|                 | <i>Atp7a</i>    | 2.99 | 20   | 4.00E-04 | <a href="#">10601360</a> |
|                 | <i>Foxj2</i>    | 2.07 | 11.4 | 0.001    | <a href="#">10541532</a> |
|                 | <i>Gca</i>      | 2.61 | 11.3 | 0.001    | <a href="#">10472350</a> |
|                 | <i>Kbtbd7</i>   | 2.85 | 13.6 | 7.00E-04 | <a href="#">10416653</a> |
|                 | <i>Nadk</i>     | 2.22 | 15.3 | 6.00E-04 | <a href="#">10511084</a> |
|                 | <i>Nfat5</i>    | 2    | 12.3 | 9.00E-04 | <a href="#">10575160</a> |
|                 | <i>Pten</i>     | 1.73 | 12.4 | 9.00E-04 | <a href="#">10462521</a> |
|                 | <i>Rnd1</i>     | 2.5  | 16.6 | 5.00E-04 | <a href="#">10432236</a> |
|                 | <i>The1d8</i>   | 2.7  | 17.7 | 5.00E-04 | <a href="#">10354168</a> |
|                 | <i>Zfp53</i>    | 2.49 | 14.1 | 7.00E-04 | <a href="#">10575213</a> |
| mmu-miR-18 (↓)  | <i>Add3</i>     | 2.25 | 13.9 | 7.00E-04 | <a href="#">10463911</a> |
|                 | <i>Fos12</i>    | 2.97 | 17.1 | 5.00E-04 | <a href="#">10520862</a> |
|                 | <i>Irf2</i>     | 2.18 | 11.9 | 0.001    | <a href="#">10571705</a> |
|                 | <i>Lin28</i>    | 3.22 | 13.8 | 7.00E-04 | <a href="#">10508907</a> |
|                 | <i>Nedd9</i>    | 3.19 | 21.5 | 4.00E-04 | <a href="#">10408850</a> |
|                 | <i>Nfat5</i>    | 2    | 12.3 | 9.00E-04 | <a href="#">10575160</a> |
|                 | <i>Notch2</i>   | 2.26 | 12.7 | 9.00E-04 | <a href="#">10494595</a> |
|                 | <i>Olfml2b</i>  | 4.24 | 15.3 | 6.00E-04 | <a href="#">10351491</a> |
|                 | <i>Pias3</i>    | 2.4  | 16.7 | 5.00E-04 | <a href="#">10494509</a> |
|                 | <i>Pten</i>     | 1.73 | 12.4 | 9.00E-04 | <a href="#">10462521</a> |
|                 | <i>Smnp2</i>    | 2.23 | 16.5 | 5.00E-04 | <a href="#">10515994</a> |
|                 | <i>Ypel5</i>    | 2.18 | 13.7 | 7.00E-04 | <a href="#">10446256</a> |
